# Supplementary material
Source: publisher figshare collection journal article supplement (https://tandf.figshare.com/articles/dataset/_/1623172)
Supplement: Supplementary file 1 [file 1]

## **Evidence for 1808–1770 Ma bimodal magmatism, sedimentation, high temperature deformation and metamorphism in the Aileron Province, central Australia**

D. HOWLETT<sup>1\*</sup>, T. RAIMONDO<sup>2</sup> AND M. HAND<sup>1</sup>

<sup>1</sup> School of Physical Sciences, University of Adelaide, Adelaide, SA 5005, Australia

<sup>2</sup> School of Natural and Built Environments, University of South Australia, GPO Box 2471, Adelaide, SA 5001, Australia

\*[daniel.howlett@adelaide.edu.au](mailto:daniel.howlett@adelaide.edu.au)

### **SUPPLEMENTARY PAPERS**

*Australian Journal of Earth Sciences* (2015) **62**,  
<http://dx.doi.org/10.1080/08120099.2015.1108364>

---

Copies of Supplementary Papers may be obtained from the Geological Society of Australia's website ([www.gsa.org.au](http://www.gsa.org.au)), the Australian Journal of Earth Sciences website ([www.ajes.com.au](http://www.ajes.com.au)) or from the National Library of Australia's Pandora archive (<http://nla.gov.au/nla.arc-25194>).

---

### **SUPPLEMENTARY PAPERS**

**Appendix 1** Full compilation of LA-ICP-MS zircon and monazite U–Pb age data.

**Appendix 1** Full compilation of LA-ICP-MS zircon and monazite U–Pb age data

Black = magmatic or detrital analyses, Green = metamorphic analyses, Red = excluded analyses

| Spot name                                                                                                              | Isotopic ratios <sup>1</sup>         |         |                                     |         |                                     |         | Conc. (%) <sup>2</sup> | Age estimates <sup>1</sup>           |        |                                     |        |                                     |        |       |
|------------------------------------------------------------------------------------------------------------------------|--------------------------------------|---------|-------------------------------------|---------|-------------------------------------|---------|------------------------|--------------------------------------|--------|-------------------------------------|--------|-------------------------------------|--------|-------|
|                                                                                                                        | <sup>207</sup> Pb/ <sup>206</sup> Pb | ±1σ     | <sup>206</sup> Pb/ <sup>238</sup> U | ±1σ     | <sup>207</sup> Pb/ <sup>235</sup> U | ±1σ     |                        | <sup>207</sup> Pb/ <sup>206</sup> Pb | ±1σ    | <sup>206</sup> Pb/ <sup>238</sup> U | ±1σ    | <sup>207</sup> Pb/ <sup>235</sup> U | ±1σ    |       |
| OG1 - Zircon: analyses used in magmatic age calculation.                                                               |                                      |         |                                     |         |                                     |         |                        |                                      |        |                                     |        |                                     |        |       |
| Z67_1                                                                                                                  | 0.10921                              | 0.00150 | 0.31294                             | 0.00496 | 4.71152                             | 0.08318 | 0.8977651              | 98                                   | 1786.2 | 24.85                               | 1755.1 | 24.36                               | 1769.3 | 14.79 |
| Z68_2                                                                                                                  | 0.11072                              | 0.00153 | 0.30853                             | 0.00370 | 4.70882                             | 0.06829 | 0.8269120              | 96                                   | 1811.3 | 24.91                               | 1733.5 | 18.21                               | 1768.8 | 12.15 |
| Z71_2                                                                                                                  | 0.11051                              | 0.00144 | 0.30913                             | 0.00388 | 4.70879                             | 0.06846 | 0.8633025              | 96                                   | 1807.8 | 23.49                               | 1736.4 | 19.08                               | 1768.8 | 12.18 |
| Z72_1                                                                                                                  | 0.11021                              | 0.00152 | 0.32012                             | 0.00410 | 4.86309                             | 0.07459 | 0.8350313              | 99                                   | 1802.8 | 24.91                               | 1790.3 | 20.04                               | 1795.9 | 12.92 |
| Z72_2                                                                                                                  | 0.11086                              | 0.00157 | 0.30504                             | 0.00392 | 4.66147                             | 0.07263 | 0.8247762              | 95                                   | 1813.5 | 25.43                               | 1716.3 | 19.37                               | 1760.4 | 13.03 |
| Z73_1                                                                                                                  | 0.11015                              | 0.00154 | 0.32051                             | 0.00396 | 4.86655                             | 0.07347 | 0.8183984              | 99                                   | 1801.8 | 25.28                               | 1792.2 | 19.31                               | 1796.5 | 12.72 |
| Z28_2                                                                                                                  | 0.10939                              | 0.00176 | 0.30925                             | 0.00389 | 4.66269                             | 0.07788 | 0.7530963              | 97                                   | 1789.2 | 28.99                               | 1737.0 | 19.17                               | 1760.6 | 13.96 |
| Z44_1                                                                                                                  | 0.11375                              | 0.00144 | 0.33003                             | 0.00477 | 5.17584                             | 0.08229 | 0.9090730              | 99                                   | 1860.2 | 22.76                               | 1838.5 | 23.12                               | 1848.7 | 13.53 |
| Z42_3                                                                                                                  | 0.10951                              | 0.00133 | 0.30454                             | 0.00432 | 4.59798                             | 0.07043 | 0.9260806              | 96                                   | 1791.3 | 21.99                               | 1713.8 | 21.37                               | 1748.9 | 12.78 |
| Z44_2                                                                                                                  | 0.11050                              | 0.00134 | 0.32172                             | 0.00458 | 4.90099                             | 0.07539 | 0.9254597              | 99                                   | 1807.6 | 21.88                               | 1798.1 | 22.32                               | 1802.4 | 12.97 |
| Z45_1                                                                                                                  | 0.11061                              | 0.00133 | 0.32181                             | 0.00462 | 4.90754                             | 0.07577 | 0.9298417              | 99                                   | 1809.4 | 21.71                               | 1798.6 | 22.54                               | 1803.6 | 13.02 |
| Z51_2                                                                                                                  | 0.10963                              | 0.00122 | 0.31726                             | 0.00466 | 4.79506                             | 0.07243 | 0.9724027              | 99                                   | 1793.3 | 20.16                               | 1776.3 | 22.79                               | 1784.0 | 12.69 |
| Z52_1                                                                                                                  | 0.11007                              | 0.00132 | 0.31664                             | 0.00472 | 4.80425                             | 0.07588 | 0.9437881              | 98                                   | 1800.6 | 21.70                               | 1773.3 | 23.11                               | 1785.6 | 13.27 |
| Z52_2                                                                                                                  | 0.11052                              | 0.00125 | 0.33314                             | 0.00480 | 5.07546                             | 0.07593 | 0.9631113              | 103                                  | 1807.9 | 20.40                               | 1853.6 | 23.23                               | 1832.0 | 12.69 |
| Z56_2                                                                                                                  | 0.11273                              | 0.00138 | 0.34630                             | 0.00508 | 5.38145                             | 0.08481 | 0.9308152              | 104                                  | 1843.8 | 22.02                               | 1916.9 | 24.35                               | 1881.9 | 13.49 |
| Z57_2                                                                                                                  | 0.11163                              | 0.00129 | 0.31265                             | 0.00478 | 4.81089                             | 0.07607 | 0.9668998              | 96                                   | 1826.1 | 20.78                               | 1753.7 | 23.49                               | 1786.8 | 13.29 |
| Z58_1                                                                                                                  | 0.10895                              | 0.00117 | 0.32601                             | 0.00471 | 4.89662                             | 0.07162 | 0.9877614              | 102                                  | 1781.9 | 19.55                               | 1819.0 | 22.90                               | 1801.7 | 12.33 |
| Z58_2                                                                                                                  | 0.10963                              | 0.00117 | 0.31796                             | 0.00470 | 4.80551                             | 0.07174 | 0.9901557              | 99                                   | 1793.2 | 19.30                               | 1779.8 | 23.00                               | 1785.9 | 12.55 |
| Z59_2                                                                                                                  | 0.11353                              | 0.00118 | 0.32911                             | 0.00474 | 5.15122                             | 0.07419 | 0.9999954              | 99                                   | 1856.7 | 18.63                               | 1834.1 | 22.99                               | 1844.6 | 12.25 |
| Z59_1                                                                                                                  | 0.10939                              | 0.00113 | 0.32126                             | 0.00468 | 4.84485                             | 0.07041 | 0.9976192              | 100                                  | 1789.3 | 18.79                               | 1795.9 | 22.81                               | 1792.7 | 12.23 |
| Z61_2                                                                                                                  | 0.10938                              | 0.00121 | 0.30342                             | 0.00462 | 4.57473                             | 0.07103 | 0.9806667              | 95                                   | 1789.1 | 20.06                               | 1708.2 | 22.86                               | 1744.7 | 12.94 |
| Z65_1                                                                                                                  | 0.11023                              | 0.00133 | 0.32364                             | 0.00471 | 4.91847                             | 0.07647 | 0.9360470              | 100                                  | 1803.2 | 21.84                               | 1807.5 | 22.91                               | 1805.4 | 13.12 |
| OG1 - zircon: excluded due to > 5% discordant.                                                                         |                                      |         |                                     |         |                                     |         |                        |                                      |        |                                     |        |                                     |        |       |
| Z70_2                                                                                                                  | 0.11149                              | 0.00139 | 0.30371                             | 0.00368 | 4.66771                             | 0.06422 | 0.8806884              | 94                                   | 1823.8 | 22.49                               | 1709.7 | 18.18                               | 1761.5 | 11.50 |
| Z27_2                                                                                                                  | 0.10876                              | 0.00152 | 0.29566                             | 0.00350 | 4.43143                             | 0.06447 | 0.8136951              | 94                                   | 1778.8 | 25.34                               | 1669.8 | 17.39                               | 1718.2 | 12.05 |
| Z45_1                                                                                                                  | 0.11050                              | 0.00119 | 0.29331                             | 0.00425 | 4.46834                             | 0.06558 | 0.9872721              | 92                                   | 1807.7 | 19.42                               | 1658.1 | 21.20                               | 1725.1 | 12.18 |
| Z48_1                                                                                                                  | 0.11153                              | 0.00118 | 0.29008                             | 0.00420 | 4.46023                             | 0.06508 | 0.9922959              | 90                                   | 1824.5 | 19.14                               | 1641.9 | 20.98                               | 1723.6 | 12.10 |
| Z56_3                                                                                                                  | 0.11462                              | 0.00151 | 0.28505                             | 0.00410 | 4.50417                             | 0.07258 | 0.8926077              | 86                                   | 1873.9 | 23.56                               | 1616.7 | 20.55                               | 1731.7 | 13.39 |
| Z57_1                                                                                                                  | 0.11083                              | 0.00131 | 0.29632                             | 0.00455 | 4.52696                             | 0.07231 | 0.9612995              | 92                                   | 1813.1 | 21.26                               | 1673.0 | 22.62                               | 1735.9 | 13.28 |
| Z61_1                                                                                                                  | 0.11017                              | 0.00122 | 0.27625                             | 0.00421 | 4.19493                             | 0.06504 | 0.9829332              | 87                                   | 1802.1 | 19.94                               | 1572.4 | 21.24                               | 1673.0 | 12.71 |
| OG1 - zircon: analyses excluded from calculations due to interpretation of inherited, metamorphic and modified grains. |                                      |         |                                     |         |                                     |         |                        |                                      |        |                                     |        |                                     |        |       |
| Z28_1                                                                                                                  | 0.11409                              | 0.00163 | 0.31563                             | 0.00381 | 4.96316                             | 0.07434 | 0.8059023              | 95                                   | 1865.6 | 25.51                               | 1768.4 | 18.68                               | 1813.1 | 12.66 |
| Z29_1                                                                                                                  | 0.14338                              | 0.00246 | 0.35081                             | 0.00434 | 6.93050                             | 0.12075 | 0.7100602              | 85                                   | 2268.4 | 29.25                               | 1938.5 | 20.73                               | 2102.6 | 15.46 |
| Z29_2                                                                                                                  | 0.10621                              | 0.00201 | 0.31136                             | 0.00415 | 4.55596                             | 0.08828 | 0.6878644              | 101                                  | 1735.3 | 34.15                               | 1747.4 | 20.42                               | 1741.3 | 16.13 |
| Z29_3                                                                                                                  | 0.10721                              | 0.00189 | 0.30166                             | 0.00388 | 4.45757                             | 0.08057 | 0.7116047              | 97                                   | 1752.5 | 31.89                               | 1699.5 | 19.23                               | 1723.1 | 14.99 |
| Z30_1                                                                                                                  | 0.10566                              | 0.00233 | 0.31300                             | 0.00437 | 4.55685                             | 0.10110 | 0.6292898              | 102                                  | 1725.8 | 39.83                               | 1755.5 | 21.46                               | 1741.4 | 18.47 |
| Z30_2                                                                                                                  | 0.10760                              | 0.00174 | 0.31449                             | 0.00380 | 4.66349                             | 0.07675 | 0.7341916              | 100                                  | 1759.1 | 29.20                               | 1762.7 | 18.66                               | 1760.7 | 13.76 |
| Z31_1                                                                                                                  | 0.10933                              | 0.00172 | 0.30935                             | 0.00368 | 4.66103                             | 0.07467 | 0.7425632              | 97                                   | 1788.2 | 28.43                               | 1737.5 | 18.13                               | 1760.3 | 13.39 |
| Z32_1                                                                                                                  | 0.10645                              | 0.00235 | 0.30811                             | 0.00420 | 4.51973                             | 0.09904 | 0.6220787              | 100                                  | 1739.5 | 39.83                               | 1731.4 | 20.71                               | 1734.6 | 18.22 |
| Z33_1                                                                                                                  | 0.10812                              | 0.00206 | 0.23836                             | 0.00307 | 3.55214                             | 0.06829 | 0.6699432              | 78                                   | 1767.9 | 34.50                               | 1378.1 | 15.97                               | 1538.9 | 15.23 |
| Z34_1                                                                                                                  | 0.10613                              | 0.00193 | 0.27668                             | 0.00352 | 4.04823                             | 0.07480 | 0.6885389              | 91                                   | 1734.0 | 32.88                               | 1574.6 | 17.80                               | 1643.9 | 15.05 |
| Z35_1                                                                                                                  | 0.10625                              | 0.00195 | 0.31408                             | 0.00398 | 4.59953                             | 0.08505 | 0.6853019              | 101                                  | 1736.1 | 33.29                               | 1760.8 | 19.51                               | 1749.2 | 15.42 |
| Z35_2                                                                                                                  | 0.10920                              | 0.00214 | 0.32412                             | 0.00428 | 4.87945                             | 0.09677 | 0.6658372              | 101                                  | 1786.0 | 35.36                               | 1809.8 | 20.83                               | 1798.7 | 16.71 |
| Z36_21                                                                                                                 | 0.13472                              | 0.00253 | 0.40570                             | 0.00521 | 7.53428                             | 0.14301 | 0.6765627              | 102                                  | 2160.4 | 32.36                               | 2195.2 | 23.90                               | 2177.1 | 17.01 |
| Z36_2                                                                                                                  | 0.10731                              | 0.00201 | 0.31650                             | 0.00403 | 4.68201                             | 0.08845 | 0.6740092              | 101                                  | 1754.3 | 33.77                               | 1772.6 | 19.75                               | 1764.0 | 15.81 |
| Z37_1                                                                                                                  | 0.11275                              | 0.00226 | 0.33626                             | 0.00438 | 5.22606                             | 0.10509 | 0.6477567              | 101                                  | 1844.1 | 35.77                               | 1868.6 | 21.13                               | 1856.9 | 17.14 |
| Z37_2                                                                                                                  | 0.10900                              | 0.00252 | 0.33905                             | 0.00461 | 5.09362                             | 0.11657 | 0.5941238              | 106                                  | 1782.7 | 41.56                               | 1882.1 | 22.21                               | 1835.0 | 19.42 |
| Z38_1                                                                                                                  | 0.10976                              | 0.00210 | 0.33103                             | 0.00414 | 5.00857                             | 0.09542 | 0.6564586              | 103                                  | 1795.5 | 34.51                               | 1843.4 | 20.06                               | 1820.8 | 16.13 |
| Z39_1                                                                                                                  | 0.10787                              | 0.00213 | 0.31435                             | 0.00397 | 4.67382                             | 0.09133 | 0.6463021              | 100                                  | 1763.7 | 35.60                               | 1762.1 | 19.45                               | 1762.6 | 16.34 |
| Z39_3                                                                                                                  | 0.10999                              | 0.00121 | 0.31607                             | 0.00442 | 4.79332                             | 0.06904 | 0.9709003              | 98                                   | 1799.3 | 19.92                               | 1770.5 | 21.64                               | 1783.7 | 12.10 |
| Z40_2                                                                                                                  | 0.10936                              | 0.00120 | 0.32073                             | 0.00450 | 4.83592                             | 0.06991 | 0.9705384              | 100                                  | 1788.8 | 19.96                               | 1793.3 | 21.95                               | 1791.2 | 12.16 |
| Z40_3                                                                                                                  | 0.10849                              | 0.00121 | 0.31939                             | 0.00450 | 4.77729                             | 0.06975 | 0.9650028              | 101                                  | 1774.1 | 20.30                               | 1786.8 | 21.98                               | 1780.9 | 12.26 |
| Z41_2                                                                                                                  | 0.11086                              | 0.00131 | 0.31193                             | 0.00443 | 4.76781                             | 0.07227 | 0.9369307              | 97                                   | 1813.6 | 21.35                               | 1750.2 | 21.79                               | 1779.2 | 12.72 |
| Z43_1                                                                                                                  | 0.11313                              | 0.00181 | 0.21271                             | 0.00349 | 3.31783                             | 0.06396 | 0.8511051              | 67                                   | 1850.2 | 28.64                               | 1243.2 | 18.53                               | 1485.3 | 15.04 |
| Z43_2                                                                                                                  | 0.10711                              | 0.00142 | 0.31585                             | 0.00490 | 4.66388                             | 0.07985 | 0.9061240              | 101                                  | 1750.7 | 24.03                               | 1769.5 | 24.00                               | 1760.8 | 14.32 |
| Z45_3                                                                                                                  | 0.09937                              | 0.00105 | 0.27321                             | 0.00395 | 3.74282                             | 0.05439 | 0.9949022              | 97                                   | 1612.4 | 19.47                               | 1557.1 | 20.00                               | 1580.6 | 11.65 |
| Z46_1                                                                                                                  | 0.11004                              | 0.00115 | 0.31594                             | 0.00457 | 4.79313                             | 0.06956 | 0.9967155              | 98                                   | 1800.1 | 18.97                               | 1769.9 | 22.37                               | 1783.7 | 12.19 |
| Z47_1                                                                                                                  | 0.10950                              | 0.00116 | 0.31308                             | 0.00453 | 4.72606                             | 0.06891 | 0.9923385              | 98                                   | 1791.0 | 19.21                               | 1755.8 | 22.24                               | 1771.9 | 12.22 |
| Z48_2                                                                                                                  | 0.11357                              | 0.00120 | 0.18227                             | 0.00264 | 2.85382                             | 0.04150 | 0.9960181              | 58                                   | 1857.3 | 18.92                               | 1079.4 | 14.37                               | 1369.8 | 10.93 |
| Z48_3                                                                                                                  | 0.10948                              | 0.00115 | 0.32831                             | 0.00475 | 4.95537                             | 0.07198 | 0.9960330              | 102                                  | 1790.8 | 19.05                               | 1830.2 | 23.04                               | 1811.7 | 12.27 |
| Z49_1                                                                                                                  | 0.10682                              | 0.00112 | 0.30860                             | 0.00446 | 4.54468                             | 0.06590 | 0.9966825              | 99                                   | 1745.9 | 19.05                               | 1733.8 | 21.97                               | 1739.2 | 12.07 |
| Z50_1                                                                                                                  | 0.11004                              | 0.00116 | 0.28692                             | 0.00415 | 4.35287                             | 0.      |                        |                                      |        |                                     |        |                                     |        |       |

**Appendix 1** Full compilation of LA-ICP-MS zircon and monazite U–Pb age data

Black = magmatic or detrital analyses, Green = metamorphic analyses, Red = excluded analyses

| Isotopic ratios <sup>1</sup>                             |                                      |         |                                     |         |                                     |         |            |                        | Age estimates <sup>1</sup>           |       |                                     |       |                                     |       |
|----------------------------------------------------------|--------------------------------------|---------|-------------------------------------|---------|-------------------------------------|---------|------------|------------------------|--------------------------------------|-------|-------------------------------------|-------|-------------------------------------|-------|
| Spot name                                                | <sup>207</sup> Pb/ <sup>206</sup> Pb | ±1σ     | <sup>206</sup> Pb/ <sup>238</sup> U | ±1σ     | <sup>207</sup> Pb/ <sup>235</sup> U | ±1σ     | <i>rho</i> | Conc. (%) <sup>2</sup> | <sup>207</sup> Pb/ <sup>206</sup> Pb | ±1σ   | <sup>206</sup> Pb/ <sup>238</sup> U | ±1σ   | <sup>207</sup> Pb/ <sup>235</sup> U | ±1σ   |
| Z67_2                                                    | 0.10766                              | 0.00169 | 0.30874                             | 0.00511 | 4.58270                             | 0.08912 | 0.8510876  | 99                     | 1760.2                               | 28.38 | 1734.5                              | 25.15 | 1746.1                              | 16.21 |
| Z68_1                                                    | 0.18192                              | 0.00262 | 0.49790                             | 0.00672 | 12.49224                            | 0.20194 | 0.8349205  | 98                     | 2670.5                               | 23.63 | 2604.8                              | 28.92 | 2642.1                              | 15.20 |
| Z69_1                                                    | 0.10892                              | 0.00139 | 0.32079                             | 0.00402 | 4.81595                             | 0.06864 | 0.8792450  | 101                    | 1781.4                               | 23.08 | 1793.6                              | 19.64 | 1787.7                              | 11.98 |
| Z69_2                                                    | 0.11415                              | 0.00166 | 0.33339                             | 0.00431 | 5.24699                             | 0.08269 | 0.8203174  | 99                     | 1866.5                               | 25.97 | 1854.8                              | 20.84 | 1860.3                              | 13.44 |
| Z70_1                                                    | 0.10901                              | 0.00137 | 0.30807                             | 0.00388 | 4.62903                             | 0.06596 | 0.8838767  | 97                     | 1782.9                               | 22.81 | 1731.2                              | 19.13 | 1754.5                              | 11.90 |
| Z71_1                                                    | 0.11347                              | 0.00144 | 0.32242                             | 0.00400 | 5.04394                             | 0.07107 | 0.8804843  | 97                     | 1855.7                               | 22.70 | 1801.6                              | 19.50 | 1826.7                              | 11.94 |
| OG2 - Zircon: analyses used in magmatic age calculation. |                                      |         |                                     |         |                                     |         |            |                        |                                      |       |                                     |       |                                     |       |
| 1                                                        | 0.10788                              | 0.00187 | 0.32342                             | 0.00402 | 4.80364                             | 0.08520 | 0.7007935  | 102                    | 1764.0                               | 31.35 | 1806.4                              | 19.60 | 1785.5                              | 14.91 |
| 2                                                        | 0.10888                              | 0.00123 | 0.31339                             | 0.00398 | 4.70289                             | 0.06329 | 0.9436863  | 99                     | 1780.6                               | 20.48 | 1757.4                              | 19.54 | 1767.8                              | 11.27 |
| 4                                                        | 0.10936                              | 0.00135 | 0.31227                             | 0.00413 | 4.70665                             | 0.06898 | 0.9024196  | 98                     | 1788.7                               | 22.33 | 1751.8                              | 20.31 | 1768.4                              | 12.27 |
| 5                                                        | 0.10720                              | 0.00124 | 0.31156                             | 0.00384 | 4.60373                             | 0.06146 | 0.9232234  | 100                    | 1752.3                               | 20.95 | 1748.4                              | 18.89 | 1749.9                              | 11.14 |
| 6                                                        | 0.11050                              | 0.00130 | 0.33562                             | 0.00428 | 5.11140                             | 0.07062 | 0.9230136  | 103                    | 1807.6                               | 21.16 | 1865.6                              | 20.67 | 1838.0                              | 11.73 |
| 7                                                        | 0.10868                              | 0.00132 | 0.31186                             | 0.00399 | 4.67151                             | 0.06610 | 0.9042095  | 98                     | 1777.4                               | 22.00 | 1749.8                              | 19.63 | 1762.2                              | 11.83 |
| 8                                                        | 0.10793                              | 0.00128 | 0.31410                             | 0.00396 | 4.67274                             | 0.06449 | 0.9134957  | 100                    | 1764.8                               | 21.47 | 1760.8                              | 19.44 | 1762.4                              | 11.54 |
| 9                                                        | 0.10941                              | 0.00149 | 0.31459                             | 0.00425 | 4.74485                             | 0.07503 | 0.8543416  | 99                     | 1789.6                               | 24.65 | 1763.2                              | 20.84 | 1775.2                              | 13.26 |
| 11                                                       | 0.10852                              | 0.00127 | 0.31471                             | 0.00385 | 4.70855                             | 0.06283 | 0.9167909  | 99                     | 1774.6                               | 21.20 | 1763.9                              | 18.90 | 1768.8                              | 11.18 |
| 12                                                       | 0.10723                              | 0.00124 | 0.31195                             | 0.00372 | 4.61156                             | 0.05992 | 0.9177703  | 100                    | 1752.9                               | 20.94 | 1750.3                              | 18.29 | 1751.4                              | 10.84 |
| 13                                                       | 0.10977                              | 0.00150 | 0.31489                             | 0.00420 | 4.76406                             | 0.07439 | 0.8541873  | 98                     | 1795.5                               | 24.69 | 1764.7                              | 20.58 | 1778.6                              | 13.10 |
| 15                                                       | 0.10863                              | 0.00148 | 0.31540                             | 0.00416 | 4.72281                             | 0.07280 | 0.8556590  | 99                     | 1776.6                               | 24.63 | 1767.2                              | 20.36 | 1771.3                              | 12.92 |
| 16                                                       | 0.11017                              | 0.00132 | 0.33061                             | 0.00395 | 5.02181                             | 0.06667 | 0.8999346  | 102                    | 1802.2                               | 21.57 | 1841.3                              | 19.15 | 1823.0                              | 11.24 |
| 17                                                       | 0.10974                              | 0.00158 | 0.33957                             | 0.00444 | 5.13871                             | 0.08167 | 0.8227070  | 105                    | 1795.1                               | 25.95 | 1884.6                              | 21.38 | 1842.5                              | 13.51 |
| 19                                                       | 0.10884                              | 0.00132 | 0.31976                             | 0.00385 | 4.79830                             | 0.06479 | 0.8916943  | 100                    | 1780.0                               | 22.03 | 1788.6                              | 18.79 | 1784.6                              | 11.35 |
| 20                                                       | 0.10722                              | 0.00133 | 0.32270                             | 0.00386 | 4.77057                             | 0.06503 | 0.8774954  | 103                    | 1752.7                               | 22.46 | 1802.9                              | 18.83 | 1779.7                              | 11.44 |
| 21                                                       | 0.10881                              | 0.00137 | 0.31237                             | 0.00358 | 4.68653                             | 0.06267 | 0.8570485  | 98                     | 1779.6                               | 22.90 | 1752.4                              | 17.58 | 1764.8                              | 11.19 |
| 22                                                       | 0.11015                              | 0.00130 | 0.31415                             | 0.00381 | 4.77013                             | 0.06361 | 0.9094791  | 98                     | 1801.8                               | 21.38 | 1761.1                              | 18.71 | 1779.7                              | 11.19 |
| 23                                                       | 0.10802                              | 0.00124 | 0.32146                             | 0.00378 | 4.78718                             | 0.06103 | 0.9223617  | 102                    | 1766.2                               | 20.82 | 1796.9                              | 18.42 | 1782.7                              | 10.71 |
| 25                                                       | 0.10936                              | 0.00133 | 0.32025                             | 0.00379 | 4.82808                             | 0.06426 | 0.8891680  | 100                    | 1788.7                               | 22.02 | 1791.0                              | 18.51 | 1789.8                              | 11.19 |
| 26                                                       | 0.10908                              | 0.00139 | 0.31808                             | 0.00374 | 4.78319                             | 0.06532 | 0.8610070  | 100                    | 1784.0                               | 23.04 | 1780.4                              | 18.27 | 1782.0                              | 11.47 |
| 27                                                       | 0.10859                              | 0.00137 | 0.33563                             | 0.00389 | 5.02490                             | 0.06768 | 0.8605100  | 105                    | 1775.8                               | 22.89 | 1865.6                              | 18.78 | 1823.5                              | 11.41 |
| 28                                                       | 0.10849                              | 0.00148 | 0.31809                             | 0.00397 | 4.75700                             | 0.07081 | 0.8384536  | 100                    | 1774.1                               | 24.74 | 1780.4                              | 19.40 | 1777.3                              | 12.49 |
| OG2 - zircon: metamorphic age.                           |                                      |         |                                     |         |                                     |         |            |                        |                                      |       |                                     |       |                                     |       |
| 30                                                       | 0.09734                              | 0.00136 | 0.27839                             | 0.00324 | 3.73609                             | 0.05430 | 0.8007720  | 101                    | 1573.7                               | 25.92 | 1583.3                              | 16.33 | 1579.1                              | 11.64 |
| OG2 - zircon: excluded due to > 5% discordant.           |                                      |         |                                     |         |                                     |         |            |                        |                                      |       |                                     |       |                                     |       |
| 3                                                        | 0.10645                              | 0.00148 | 0.27888                             | 0.00339 | 4.09320                             | 0.06112 | 0.8140704  | 91                     | 1739.4                               | 25.35 | 1585.7                              | 17.10 | 1652.9                              | 12.18 |
| 10                                                       | 0.10894                              | 0.00138 | 0.33970                             | 0.00433 | 5.10206                             | 0.07377 | 0.8815727  | 106                    | 1781.7                               | 23.04 | 1885.2                              | 20.84 | 1836.4                              | 12.28 |
| 14                                                       | 0.10862                              | 0.00154 | 0.19490                             | 0.00232 | 2.91866                             | 0.04318 | 0.8045944  | 65                     | 1776.3                               | 25.70 | 1147.9                              | 12.53 | 1386.8                              | 11.19 |
| 18                                                       | 0.10774                              | 0.00152 | 0.27707                             | 0.00325 | 4.11555                             | 0.06034 | 0.8000487  | 90                     | 1761.5                               | 25.49 | 1576.6                              | 16.40 | 1657.4                              | 11.98 |
| 24                                                       | 0.10973                              | 0.00140 | 0.29297                             | 0.00346 | 4.43159                             | 0.06068 | 0.8625156  | 92                     | 1794.9                               | 23.03 | 1656.3                              | 17.25 | 1718.3                              | 11.34 |
| 29                                                       | 0.11453                              | 0.00146 | 0.36620                             | 0.00432 | 5.78251                             | 0.07900 | 0.8634848  | 107                    | 1872.5                               | 22.77 | 2011.5                              | 20.37 | 1943.8                              | 11.83 |
| OG3 - Zircon: analyses used in magmatic age calculation. |                                      |         |                                     |         |                                     |         |            |                        |                                      |       |                                     |       |                                     |       |
| Z08                                                      | 0.11108                              | 0.00155 | 0.30747                             | 0.00359 | 4.70844                             | 0.06833 | 0.8045579  | 95                     | 1817.1                               | 25.13 | 1728.2                              | 17.70 | 1768.7                              | 12.16 |
| Z09                                                      | 0.11130                              | 0.00148 | 0.30914                             | 0.00351 | 4.74363                             | 0.06541 | 0.8234146  | 95                     | 1820.7                               | 24.01 | 1736.5                              | 17.27 | 1775.0                              | 11.56 |
| Z10                                                      | 0.11209                              | 0.00200 | 0.31811                             | 0.00407 | 4.91554                             | 0.08992 | 0.6994103  | 97                     | 1833.5                               | 31.98 | 1780.5                              | 19.89 | 1804.9                              | 15.44 |
| Z14                                                      | 0.10981                              | 0.00131 | 0.30256                             | 0.00331 | 4.58047                             | 0.05697 | 0.8795900  | 95                     | 1796.2                               | 21.63 | 1704.0                              | 16.39 | 1745.7                              | 10.37 |
| Z15                                                      | 0.10873                              | 0.00134 | 0.30465                             | 0.00332 | 4.56681                             | 0.05780 | 0.8210374  | 96                     | 1778.2                               | 22.31 | 1714.3                              | 16.42 | 1743.2                              | 10.54 |
| Z16                                                      | 0.10910                              | 0.00147 | 0.30366                             | 0.00355 | 4.56759                             | 0.06487 | 0.8631595  | 96                     | 1784.4                               | 24.37 | 1709.4                              | 17.56 | 1743.4                              | 11.83 |
| Z17                                                      | 0.10998                              | 0.00141 | 0.30261                             | 0.00340 | 4.58804                             | 0.06121 | 0.8421713  | 95                     | 1799.0                               | 23.14 | 1704.2                              | 16.85 | 1747.1                              | 11.12 |
| Z18                                                      | 0.10793                              | 0.00189 | 0.31694                             | 0.00410 | 4.71651                             | 0.08606 | 0.7089673  | 101                    | 1764.8                               | 31.69 | 1774.7                              | 20.08 | 1770.2                              | 15.29 |
| Z20                                                      | 0.10850                              | 0.00154 | 0.30529                             | 0.00357 | 4.56702                             | 0.06756 | 0.7904946  | 97                     | 1774.4                               | 25.74 | 1717.5                              | 17.65 | 1743.3                              | 12.32 |
| 3                                                        | 0.10906                              | 0.00160 | 0.31557                             | 0.00443 | 4.74330                             | 0.07913 | 0.8414871  | 99                     | 1783.7                               | 26.51 | 1768.1                              | 21.73 | 1774.9                              | 13.99 |
| 9                                                        | 0.11064                              | 0.00135 | 0.32443                             | 0.00380 | 4.94861                             | 0.06546 | 0.8854618  | 100                    | 1809.9                               | 22.03 | 1811.3                              | 18.51 | 1810.6                              | 11.17 |
| 11                                                       | 0.11068                              | 0.00147 | 0.31767                             | 0.00399 | 4.84820                             | 0.07167 | 0.8496495  | 98                     | 1810.7                               | 24.00 | 1778.3                              | 19.50 | 1793.3                              | 12.44 |
| 15                                                       | 0.10969                              | 0.00131 | 0.31646                             | 0.00359 | 4.78344                             | 0.06093 | 0.8906043  | 99                     | 1794.2                               | 21.58 | 1772.4                              | 17.59 | 1782.0                              | 10.70 |
| 20                                                       | 0.10963                              | 0.00134 | 0.31190                             | 0.00358 | 4.71124                             | 0.06154 | 0.8787096  | 98                     | 1793.3                               | 22.10 | 1750.1                              | 17.59 | 1769.2                              | 10.94 |
| 21                                                       | 0.10941                              | 0.00131 | 0.31856                             | 0.00368 | 4.80505                             | 0.06195 | 0.8960107  | 100                    | 1789.6                               | 21.62 | 1782.7                              | 18.00 | 1785.8                              | 10.84 |
| 22                                                       | 0.10924                              | 0.00127 | 0.30430                             | 0.00336 | 4.58276                             | 0.05585 | 0.9060273  | 96                     | 1786.7                               | 21.02 | 1712.6                              | 16.58 | 1746.1                              | 10.16 |
| 23                                                       | 0.10924                              | 0.00126 | 0.32632                             | 0.00371 | 4.91374                             | 0.06126 | 0.9119382  | 102                    | 1786.7                               | 20.97 | 1820.5                              | 18.05 | 1804.6                              | 10.52 |
| 25                                                       | 0.10800                              | 0.00123 | 0.29994                             | 0.00322 | 4.46568                             | 0.05257 | 0.9119502  | 96                     | 1765.9                               | 20.64 | 1691.0                              | 15.99 | 1724.6                              | 9.77  |
| 28                                                       | 0.11006                              | 0.00141 | 0.32274                             | 0.00355 | 4.89743                             | 0.06397 | 0.8421073  | 100                    | 1800.4                               | 23.12 | 1803.1                              | 17.29 | 1801.8                              | 11.01 |
| 29                                                       | 0.11073                              | 0.00139 | 0.30574                             | 0.00344 | 4.66714                             | 0.06124 | 0.8574757  | 95                     | 1811.5                               | 22.64 | 1719.7                              | 16.99 | 1761.4                              | 10.97 |
| 31                                                       | 0.11195                              | 0.00141 | 0.32904                             | 0.00384 | 5.07776                             | 0.06836 | 0.8668673  | 100                    | 1831.3                               | 22.58 | 1833.7                              | 18.62 | 1832.4                              | 11.42 |
| 33                                                       | 0.10908                              | 0.00163 | 0.30074                             | 0.00386 | 4.52126                             | 0.07317 | 0.7930901  | 95                     | 1784.0                               | 27.11 | 1695.0                              | 19.11 | 1734.9                              | 13.46 |
| 34                                                       | 0.11043                              | 0.00148 | 0.32022                             | 0.00385 | 4.87506                             | 0.07021 | 0.8348208  | 99                     | 1806.6                               | 24.16 | 1790.8                              | 18.79 | 1798.0                              | 12.13 |
| 37                                                       | 0.11091                              | 0.00175 | 0.31525                             | 0.00352 | 4.81905                             | 0.07531 | 0.7144903  | 97                     | 1814.4                               | 28.41 | 1766.5                              | 17.23 | 1788.2                              | 13.14 |
| OG3 - zircon: excluded due to > 5% discordant.           |                                      |         |                                     |         |                                     |         |            |                        |                                      |       |                                     |       |                                     |       |
| Z02                                                      | 0.11194                              | 0.00157 | 0.29285                             | 0.00347 | 4.51919                             | 0.06660 | 0.8040270  | 90                     | 1831.1                               | 25.15 | 1655.7                              | 17.31 | 1734.5                              | 12.25 |
| Z04                                                      | 0.10180                              | 0.0014  |                                     |         |                                     |         |            |                        |                                      |       |                                     |       |                                     |       |

**Appendix 1** Full compilation of LA-ICP-MS zircon and monazite U–Pb age data

Black = magmatic or detrital analyses, Green = metamorphic analyses, Red = excluded analyses

| Isotopic ratios <sup>1</sup>                                                                                                      |                                      |         |                                     |         |                                     |         |           |                        |                                      |       |                                     |       |                                     | Age estimates <sup>1</sup> |  |  |  |  |  |
|-----------------------------------------------------------------------------------------------------------------------------------|--------------------------------------|---------|-------------------------------------|---------|-------------------------------------|---------|-----------|------------------------|--------------------------------------|-------|-------------------------------------|-------|-------------------------------------|----------------------------|--|--|--|--|--|
| Spot name                                                                                                                         | <sup>207</sup> Pb/ <sup>206</sup> Pb | ±1σ     | <sup>206</sup> Pb/ <sup>238</sup> U | ±1σ     | <sup>207</sup> Pb/ <sup>235</sup> U | ±1σ     | rho       | Conc. (%) <sup>2</sup> | <sup>207</sup> Pb/ <sup>206</sup> Pb | ±1σ   | <sup>206</sup> Pb/ <sup>238</sup> U | ±1σ   | <sup>207</sup> Pb/ <sup>235</sup> U | ±1σ                        |  |  |  |  |  |
| 10                                                                                                                                | 0.11030                              | 0.00148 | 0.30163                             | 0.00393 | 4.58691                             | 0.06994 | 0.8545011 | 94                     | 1804.4                               | 24.28 | 1699.4                              | 19.46 | 1746.9                              | 12.71                      |  |  |  |  |  |
| 12                                                                                                                                | 0.11675                              | 0.00135 | 0.31592                             | 0.00359 | 5.08281                             | 0.06341 | 0.9108848 | 93                     | 1907.0                               | 20.64 | 1769.8                              | 17.56 | 1833.2                              | 10.58                      |  |  |  |  |  |
| 13                                                                                                                                | 0.10987                              | 0.00157 | 0.28218                             | 0.00352 | 4.27462                             | 0.06580 | 0.8103788 | 89                     | 1797.3                               | 25.78 | 1602.3                              | 17.72 | 1688.5                              | 12.67                      |  |  |  |  |  |
| 14                                                                                                                                | 0.10746                              | 0.00159 | 0.25904                             | 0.00319 | 3.83887                             | 0.06028 | 0.7842491 | 85                     | 1756.8                               | 26.83 | 1484.9                              | 16.32 | 1600.9                              | 12.65                      |  |  |  |  |  |
| 17                                                                                                                                | 0.10783                              | 0.00130 | 0.29192                             | 0.00332 | 4.33751                             | 0.05563 | 0.8867591 | 94                     | 1763.0                               | 21.77 | 1651.1                              | 16.55 | 1700.5                              | 10.58                      |  |  |  |  |  |
| 18                                                                                                                                | 0.11059                              | 0.00136 | 0.27719                             | 0.00313 | 4.22356                             | 0.05491 | 0.8685484 | 87                     | 1809.0                               | 22.23 | 1577.2                              | 15.81 | 1678.6                              | 10.67                      |  |  |  |  |  |
| 26                                                                                                                                | 0.11932                              | 0.00136 | 0.31023                             | 0.00339 | 5.10302                             | 0.06107 | 0.9130935 | 90                     | 1946.1                               | 20.25 | 1741.8                              | 16.66 | 1836.6                              | 10.16                      |  |  |  |  |  |
| 27                                                                                                                                | 0.10634                              | 0.00143 | 0.28992                             | 0.00306 | 4.25019                             | 0.05621 | 0.7980645 | 94                     | 1737.7                               | 24.42 | 1641.1                              | 15.30 | 1683.8                              | 10.87                      |  |  |  |  |  |
| 32                                                                                                                                | 0.14385                              | 0.00186 | 0.23267                             | 0.00256 | 4.61371                             | 0.06088 | 0.8338256 | 59                     | 2274.1                               | 22.13 | 1348.5                              | 13.36 | 1751.8                              | 11.01                      |  |  |  |  |  |
| 35                                                                                                                                | 0.14046                              | 0.00176 | 0.38009                             | 0.00439 | 7.35882                             | 0.09818 | 0.8656917 | 93                     | 2232.8                               | 21.52 | 2076.7                              | 20.49 | 2156.0                              | 11.93                      |  |  |  |  |  |
| 38                                                                                                                                | 0.11710                              | 0.00174 | 0.28265                             | 0.00322 | 4.56127                             | 0.06877 | 0.7556029 | 84                     | 1912.4                               | 26.50 | 1604.7                              | 16.16 | 1742.2                              | 12.56                      |  |  |  |  |  |
| 39                                                                                                                                | 0.13295                              | 0.00226 | 0.25731                             | 0.00332 | 4.71598                             | 0.08397 | 0.7246515 | 69                     | 2137.3                               | 29.37 | 1476.1                              | 17.04 | 1770.1                              | 14.92                      |  |  |  |  |  |
| 40                                                                                                                                | 0.11023                              | 0.00173 | 0.29841                             | 0.00333 | 4.53344                             | 0.07060 | 0.7165624 | 93                     | 1803.3                               | 28.21 | 1683.4                              | 16.55 | 1737.1                              | 12.95                      |  |  |  |  |  |
| OG3 - zircon: concordant analyses excluded from calculations based on interpretation of populations from probability density plot |                                      |         |                                     |         |                                     |         |           |                        |                                      |       |                                     |       |                                     |                            |  |  |  |  |  |
| Z03                                                                                                                               | 0.10659                              | 0.00143 | 0.30330                             | 0.00349 | 4.45646                             | 0.06233 | 0.8227083 | 98                     | 1741.9                               | 24.34 | 1707.6                              | 17.26 | 1722.9                              | 11.60                      |  |  |  |  |  |
| 36                                                                                                                                | 0.10628                              | 0.00129 | 0.30683                             | 0.00342 | 4.49514                             | 0.05750 | 0.8713721 | 99                     | 1736.6                               | 22.17 | 1725.1                              | 16.89 | 1730.1                              | 10.62                      |  |  |  |  |  |
| Z01                                                                                                                               | 0.11354                              | 0.00170 | 0.32720                             | 0.00413 | 5.12160                             | 0.08244 | 0.7841595 | 98                     | 1856.9                               | 26.87 | 1824.8                              | 20.06 | 1839.7                              | 13.67                      |  |  |  |  |  |
| 6                                                                                                                                 | 0.14088                              | 0.00157 | 0.42538                             | 0.00473 | 8.26071                             | 0.09876 | 0.9300801 | 102                    | 2238.1                               | 19.19 | 2284.8                              | 21.39 | 2260.0                              | 10.83                      |  |  |  |  |  |
| 16                                                                                                                                | 0.11488                              | 0.00140 | 0.33183                             | 0.00379 | 5.25299                             | 0.06815 | 0.8803681 | 98                     | 1877.9                               | 21.82 | 1847.2                              | 18.32 | 1861.3                              | 11.07                      |  |  |  |  |  |
| 19                                                                                                                                | 0.11553                              | 0.00176 | 0.32069                             | 0.00360 | 5.10368                             | 0.07741 | 0.7401222 | 95                     | 1888.2                               | 27.10 | 1793.1                              | 17.59 | 1836.7                              | 12.88                      |  |  |  |  |  |
| 24                                                                                                                                | 0.11487                              | 0.00130 | 0.31978                             | 0.00347 | 5.06382                             | 0.05977 | 0.9193337 | 95                     | 1877.8                               | 20.20 | 1788.7                              | 16.95 | 1830.1                              | 10.01                      |  |  |  |  |  |
| 5                                                                                                                                 | 0.17703                              | 0.00201 | 0.48643                             | 0.00545 | 11.87013                            | 0.14351 | 0.9267220 | 97                     | 2625.2                               | 18.73 | 2555.2                              | 23.65 | 2594.2                              | 11.32                      |  |  |  |  |  |
| Z11                                                                                                                               | 0.09653                              | 0.00111 | 0.26485                             | 0.00290 | 3.52452                             | 0.04250 | 0.9080486 | 97                     | 1558.0                               | 21.35 | 1514.6                              | 14.76 | 1532.7                              | 9.54                       |  |  |  |  |  |
| Z07                                                                                                                               | 0.11279                              | 0.00168 | 0.32672                             | 0.00398 | 5.08044                             | 0.07926 | 0.7808266 | 99                     | 1844.8                               | 26.66 | 1822.5                              | 19.35 | 1832.8                              | 13.24                      |  |  |  |  |  |
| MS1 - zircon: analyses used in probability density plot                                                                           |                                      |         |                                     |         |                                     |         |           |                        |                                      |       |                                     |       |                                     |                            |  |  |  |  |  |
| 001-2                                                                                                                             | 0.19746                              | 0.00235 | 0.52216                             | 0.00591 | 14.21758                            | 0.17830 | 0.9025229 | 97                     | 2805.3                               | 19.32 | 2708.3                              | 25.04 | 2764.3                              | 11.90                      |  |  |  |  |  |
| 001-3                                                                                                                             | 0.15207                              | 0.00187 | 0.43341                             | 0.00519 | 9.08718                             | 0.12103 | 0.8990928 | 98                     | 2369.3                               | 20.82 | 2321.1                              | 23.33 | 2346.8                              | 12.18                      |  |  |  |  |  |
| 001-5                                                                                                                             | 0.12040                              | 0.00154 | 0.33946                             | 0.00412 | 5.63250                             | 0.07824 | 0.8737375 | 96                     | 1962.2                               | 22.55 | 1884.1                              | 19.82 | 1921.1                              | 11.98                      |  |  |  |  |  |
| 001-6                                                                                                                             | 0.10927                              | 0.00159 | 0.29772                             | 0.00380 | 4.48326                             | 0.06952 | 0.8231135 | 94                     | 1787.3                               | 26.27 | 1680.0                              | 18.88 | 1727.9                              | 12.87                      |  |  |  |  |  |
| 001-8                                                                                                                             | 0.12032                              | 0.00177 | 0.33503                             | 0.00452 | 5.55589                             | 0.08968 | 0.8358200 | 95                     | 1960.9                               | 25.96 | 1862.7                              | 21.84 | 1909.3                              | 13.89                      |  |  |  |  |  |
| 001-9                                                                                                                             | 0.09860                              | 0.00145 | 0.26605                             | 0.00382 | 3.61572                             | 0.06158 | 0.8430536 | 95                     | 1597.8                               | 27.12 | 1520.7                              | 19.47 | 1553.0                              | 13.55                      |  |  |  |  |  |
| 001-11                                                                                                                            | 0.15176                              | 0.00183 | 0.42810                             | 0.00550 | 8.95632                             | 0.12577 | 0.9148924 | 97                     | 2365.8                               | 20.45 | 2297.2                              | 24.81 | 2333.6                              | 12.83                      |  |  |  |  |  |
| 001-12                                                                                                                            | 0.14857                              | 0.00167 | 0.43249                             | 0.00505 | 8.86039                             | 0.11057 | 0.9356875 | 99                     | 2329.5                               | 19.15 | 2316.9                              | 22.74 | 2323.7                              | 11.39                      |  |  |  |  |  |
| 001-15                                                                                                                            | 0.14474                              | 0.00174 | 0.41330                             | 0.00459 | 8.24848                             | 0.10288 | 0.8904105 | 98                     | 2284.7                               | 20.53 | 2230.0                              | 20.95 | 2258.7                              | 11.30                      |  |  |  |  |  |
| 001-16                                                                                                                            | 0.11599                              | 0.00153 | 0.35929                             | 0.00491 | 5.74467                             | 0.08976 | 0.8746184 | 104                    | 1895.2                               | 23.59 | 1978.8                              | 23.31 | 1938.1                              | 13.51                      |  |  |  |  |  |
| 001-17                                                                                                                            | 0.11121                              | 0.00140 | 0.30928                             | 0.00384 | 4.74197                             | 0.06651 | 0.8852200 | 95                     | 1819.3                               | 22.74 | 1737.2                              | 18.92 | 1774.7                              | 11.76                      |  |  |  |  |  |
| 001-18                                                                                                                            | 0.12318                              | 0.00141 | 0.36908                             | 0.00438 | 6.26893                             | 0.08013 | 0.9284358 | 101                    | 2002.7                               | 20.23 | 2025.1                              | 20.64 | 2014.1                              | 11.19                      |  |  |  |  |  |
| 001-19                                                                                                                            | 0.15609                              | 0.00203 | 0.46227                             | 0.00621 | 9.94635                             | 0.15086 | 0.8856977 | 101                    | 2413.7                               | 21.92 | 2449.6                              | 27.36 | 2429.8                              | 13.99                      |  |  |  |  |  |
| 001-20                                                                                                                            | 0.11672                              | 0.00131 | 0.33842                             | 0.00394 | 5.44650                             | 0.06772 | 0.9363555 | 99                     | 1906.6                               | 19.97 | 1879.1                              | 19.00 | 1892.2                              | 10.67                      |  |  |  |  |  |
| 001-21                                                                                                                            | 0.18924                              | 0.00227 | 0.53274                             | 0.00660 | 13.89690                            | 0.18928 | 0.9095820 | 101                    | 2735.6                               | 19.58 | 2753.0                              | 27.76 | 2742.7                              | 12.90                      |  |  |  |  |  |
| 001-22                                                                                                                            | 0.18906                              | 0.00226 | 0.53165                             | 0.00598 | 13.86094                            | 0.17359 | 0.8981386 | 101                    | 2734.0                               | 19.55 | 2748.4                              | 25.16 | 2740.3                              | 11.86                      |  |  |  |  |  |
| 001-25                                                                                                                            | 0.14528                              | 0.00176 | 0.44050                             | 0.00545 | 8.82343                             | 0.12010 | 0.9089605 | 103                    | 2291.1                               | 20.70 | 2352.9                              | 24.37 | 2319.9                              | 12.41                      |  |  |  |  |  |
| 001-28                                                                                                                            | 0.14883                              | 0.00213 | 0.42902                             | 0.00572 | 8.80163                             | 0.14054 | 0.8349907 | 99                     | 2332.5                               | 24.35 | 2301.3                              | 25.80 | 2317.7                              | 14.56                      |  |  |  |  |  |
| 001-29                                                                                                                            | 0.11005                              | 0.00143 | 0.30558                             | 0.00409 | 4.63547                             | 0.07038 | 0.8815418 | 95                     | 1800.2                               | 23.52 | 1718.9                              | 20.21 | 1755.7                              | 12.68                      |  |  |  |  |  |
| 001-30                                                                                                                            | 0.11817                              | 0.00152 | 0.34875                             | 0.00436 | 5.68170                             | 0.08077 | 0.8794284 | 100                    | 1928.7                               | 22.81 | 1928.6                              | 20.86 | 1928.6                              | 12.27                      |  |  |  |  |  |
| 001-31                                                                                                                            | 0.16074                              | 0.00234 | 0.44348                             | 0.00613 | 9.82594                             | 0.16032 | 0.8471744 | 96                     | 2463.4                               | 24.41 | 2366.2                              | 27.39 | 2418.6                              | 15.04                      |  |  |  |  |  |
| 001-32                                                                                                                            | 0.11321                              | 0.00133 | 0.33624                             | 0.00381 | 5.24824                             | 0.06581 | 0.9036441 | 101                    | 1851.5                               | 21.13 | 1868.6                              | 18.39 | 1860.5                              | 10.69                      |  |  |  |  |  |
| 001-34                                                                                                                            | 0.14741                              | 0.00179 | 0.41554                             | 0.00501 | 8.44473                             | 0.11337 | 0.8980748 | 97                     | 2316.1                               | 20.65 | 2240.2                              | 22.81 | 2280.0                              | 12.19                      |  |  |  |  |  |
| 001-35                                                                                                                            | 0.11294                              | 0.00148 | 0.34832                             | 0.00445 | 5.42174                             | 0.08022 | 0.8634509 | 104                    | 1847.3                               | 23.55 | 1926.6                              | 21.28 | 1888.3                              | 12.68                      |  |  |  |  |  |
| 001-36                                                                                                                            | 0.15202                              | 0.00262 | 0.43902                             | 0.00674 | 9.19308                             | 0.17635 | 0.8003154 | 99                     | 2368.7                               | 29.16 | 2346.2                              | 30.18 | 2357.4                              | 17.57                      |  |  |  |  |  |
| 001-37                                                                                                                            | 0.15063                              | 0.00201 | 0.42800                             | 0.00560 | 8.88630                             | 0.13256 | 0.8771073 | 98                     | 2353.1                               | 22.63 | 2296.7                              | 25.29 | 2326.4                              | 13.61                      |  |  |  |  |  |
| 001-38                                                                                                                            | 0.16563                              | 0.00213 | 0.44956                             | 0.00586 | 10.26213                            | 0.15150 | 0.8829474 | 95                     | 2514.0                               | 21.49 | 2393.3                              | 26.07 | 2458.7                              | 13.66                      |  |  |  |  |  |
| 001-40                                                                                                                            | 0.11180                              | 0.00160 | 0.33825                             | 0.00396 | 5.21383                             | 0.07558 | 0.8076205 | 103                    | 1828.9                               | 25.79 | 1878.3                              | 19.05 | 1854.9                              | 12.35                      |  |  |  |  |  |
| 001-41                                                                                                                            | 0.18061                              | 0.00246 | 0.51761                             | 0.00710 | 12.88622                            | 0.20040 | 0.8820303 | 101                    | 2658.5                               | 22.37 | 2689.0                              | 30.16 | 2671.4                              | 14.65                      |  |  |  |  |  |
| 001-42                                                                                                                            | 0.12047                              | 0.00200 | 0.37257                             | 0.00551 | 6.18491                             | 0.11472 | 0.7973297 | 104                    | 1963.2                               | 29.36 | 2041.5                              | 25.90 | 2002.3                              | 16.21                      |  |  |  |  |  |
| 001-44                                                                                                                            | 0.11520                              | 0.00229 | 0.33328                             | 0.00492 | 5.29222                             | 0.10715 | 0.7291243 | 98                     | 1883.0                               | 35.39 | 1854.3                              | 23.79 | 1867.6                              | 17.29                      |  |  |  |  |  |
| 001-45                                                                                                                            | 0.19936                              | 0.00292 | 0.54826                             | 0.00766 | 15.06449                            | 0.24577 | 0.8563825 | 100                    | 2820.9                               | 23.73 | 2817.9                              | 31.90 | 2819.3                              | 15.53                      |  |  |  |  |  |
| 001-47                                                                                                                            | 0.13325                              | 0.00199 | 0.40317                             | 0.00557 | 7.40457                             | 0.12266 | 0.8339958 | 102                    | 2141.2                               | 25.91 | 2183.6                              | 25.59 | 2161.5                              | 14.82                      |  |  |  |  |  |
| 001-48                                                                                                                            | 0.14570                              | 0.00193 | 0.44223                             | 0.00598 | 8.88084                             | 0.13688 | 0.8773382 | 103                    | 2296.1                               | 22.55 | 2360.6                              | 26.75 | 2325.8                              | 14.07                      |  |  |  |  |  |
| 001-49                                                                                                                            | 0.14169                              | 0.00219 | 0.44057                             | 0.00624 | 8.60437                             | 0.14813 | 0.8227080 | 105                    | 2248.0                               | 26.45 | 2353.2                              | 27.92 | 2297.0                              | 15.66                      |  |  |  |  |  |
| 001-50                                                                                                                            | 0.14019                              | 0.00181 | 0.41874                             | 0.00555 | 8.09129                             | 0.12160 | 0.8819272 | 101                    | 2229.5                               | 22.22 | 2254.8                              | 25.2  |                                     |                            |  |  |  |  |  |

**Appendix 1** Full compilation of LA-ICP-MS zircon and monazite U–Pb age data

Black = magmatic or detrital analyses, Green = metamorphic analyses, Red = excluded analyses

| Isotopic ratios <sup>1</sup>                    |                                      |         |                                     |         |                                     |         |            |                        |                                      |       |                                     |       |                                     | Age estimates <sup>1</sup> |  |  |  |  |  |
|-------------------------------------------------|--------------------------------------|---------|-------------------------------------|---------|-------------------------------------|---------|------------|------------------------|--------------------------------------|-------|-------------------------------------|-------|-------------------------------------|----------------------------|--|--|--|--|--|
| Spot name                                       | <sup>207</sup> Pb/ <sup>206</sup> Pb | ±1σ     | <sup>206</sup> Pb/ <sup>238</sup> U | ±1σ     | <sup>207</sup> Pb/ <sup>235</sup> U | ±1σ     | <i>rho</i> | Conc. (%) <sup>2</sup> | <sup>207</sup> Pb/ <sup>206</sup> Pb | ±1σ   | <sup>206</sup> Pb/ <sup>238</sup> U | ±1σ   | <sup>207</sup> Pb/ <sup>235</sup> U | ±1σ                        |  |  |  |  |  |
| 001-72                                          | 0.12364                              | 0.00149 | 0.34784                             | 0.00417 | 5.92949                             | 0.07910 | 0.8986641  | 96                     | 2009.4                               | 21.26 | 1924.3                              | 19.95 | 1965.6                              | 11.59                      |  |  |  |  |  |
| 001-73                                          | 0.11066                              | 0.00176 | 0.33334                             | 0.00467 | 5.08395                             | 0.08877 | 0.8023512  | 102                    | 1810.3                               | 28.70 | 1854.5                              | 22.60 | 1833.4                              | 14.82                      |  |  |  |  |  |
| 001-74                                          | 0.11008                              | 0.00157 | 0.31294                             | 0.00422 | 4.74767                             | 0.07610 | 0.8412929  | 97                     | 1800.6                               | 25.74 | 1755.2                              | 20.73 | 1775.7                              | 13.44                      |  |  |  |  |  |
| 001-76                                          | 0.10383                              | 0.00179 | 0.31653                             | 0.00438 | 4.52908                             | 0.08391 | 0.7468880  | 105                    | 1693.7                               | 31.49 | 1772.8                              | 21.44 | 1736.3                              | 15.41                      |  |  |  |  |  |
| 001-77                                          | 0.13438                              | 0.00199 | 0.41836                             | 0.00571 | 7.74846                             | 0.12727 | 0.8309508  | 104                    | 2156.0                               | 25.66 | 2253.0                              | 25.96 | 2202.2                              | 14.77                      |  |  |  |  |  |
| 001-78                                          | 0.12076                              | 0.00229 | 0.35065                             | 0.00516 | 5.83630                             | 0.11449 | 0.7501462  | 98                     | 1967.4                               | 33.42 | 1937.7                              | 24.63 | 1951.8                              | 17.01                      |  |  |  |  |  |
| 001-79                                          | 0.15862                              | 0.00225 | 0.47207                             | 0.00643 | 10.32001                            | 0.16548 | 0.8494527  | 102                    | 2441.0                               | 23.79 | 2492.6                              | 28.17 | 2463.9                              | 14.84                      |  |  |  |  |  |
| 001-80                                          | 0.11264                              | 0.00158 | 0.32660                             | 0.00411 | 5.07060                             | 0.07695 | 0.8292326  | 99                     | 1842.4                               | 25.18 | 1821.9                              | 19.95 | 1831.2                              | 12.87                      |  |  |  |  |  |
| 001-82                                          | 0.13398                              | 0.00203 | 0.40017                             | 0.00554 | 7.38882                             | 0.12459 | 0.8210264  | 101                    | 2150.8                               | 26.17 | 2169.8                              | 25.49 | 2159.6                              | 15.08                      |  |  |  |  |  |
| 001-83                                          | 0.15859                              | 0.00320 | 0.47010                             | 0.00740 | 10.27434                            | 0.21559 | 0.7501823  | 102                    | 2440.7                               | 33.82 | 2484.0                              | 32.45 | 2459.8                              | 19.42                      |  |  |  |  |  |
| 001-84                                          | 0.18367                              | 0.00243 | 0.51045                             | 0.00672 | 12.92118                            | 0.19563 | 0.8695264  | 99                     | 2686.3                               | 21.73 | 2658.5                              | 28.70 | 2673.9                              | 14.27                      |  |  |  |  |  |
| 001-85                                          | 0.16872                              | 0.00242 | 0.46232                             | 0.00598 | 10.75128                            | 0.16711 | 0.8321780  | 96                     | 2545.0                               | 23.86 | 2449.8                              | 26.35 | 2501.9                              | 14.44                      |  |  |  |  |  |
| 001-86                                          | 0.16034                              | 0.00279 | 0.44075                             | 0.00641 | 9.73910                             | 0.18367 | 0.7711632  | 96                     | 2459.2                               | 29.15 | 2354.0                              | 28.68 | 2410.4                              | 17.37                      |  |  |  |  |  |
| 001-87                                          | 0.17926                              | 0.00396 | 0.50130                             | 0.00818 | 12.38164                            | 0.27924 | 0.7235293  | 99                     | 2646.0                               | 36.16 | 2619.4                              | 35.13 | 2633.8                              | 21.19                      |  |  |  |  |  |
| 001-88                                          | 0.14560                              | 0.00204 | 0.43787                             | 0.00531 | 8.78698                             | 0.13121 | 0.8121234  | 102                    | 2294.9                               | 23.90 | 2341.1                              | 23.81 | 2316.1                              | 13.61                      |  |  |  |  |  |
| 001-89                                          | 0.12595                              | 0.00195 | 0.37463                             | 0.00492 | 6.50309                             | 0.10717 | 0.7969096  | 100                    | 2042.1                               | 27.06 | 2051.1                              | 23.09 | 2046.3                              | 14.50                      |  |  |  |  |  |
| 001-90                                          | 0.11562                              | 0.00188 | 0.33678                             | 0.00460 | 5.36670                             | 0.09388 | 0.7808107  | 99                     | 1889.6                               | 28.97 | 1871.2                              | 22.17 | 1879.6                              | 14.97                      |  |  |  |  |  |
| 001-92                                          | 0.14250                              | 0.00213 | 0.41392                             | 0.00561 | 8.12811                             | 0.13371 | 0.8238955  | 99                     | 2257.8                               | 25.56 | 2232.8                              | 25.56 | 2245.4                              | 14.87                      |  |  |  |  |  |
| 001-93                                          | 0.11549                              | 0.00169 | 0.34824                             | 0.00476 | 5.54228                             | 0.09157 | 0.8273010  | 102                    | 1887.5                               | 26.11 | 1926.2                              | 22.77 | 1907.2                              | 14.21                      |  |  |  |  |  |
| 001-94                                          | 0.11303                              | 0.00218 | 0.33577                             | 0.00502 | 5.22966                             | 0.10680 | 0.7320892  | 101                    | 1848.6                               | 34.52 | 1866.3                              | 24.23 | 1857.5                              | 17.41                      |  |  |  |  |  |
| 001-95                                          | 0.11097                              | 0.00215 | 0.33708                             | 0.00501 | 5.15458                             | 0.10515 | 0.7285993  | 103                    | 1815.4                               | 34.85 | 1872.6                              | 24.14 | 1845.2                              | 17.35                      |  |  |  |  |  |
| 001-97                                          | 0.16747                              | 0.00262 | 0.46308                             | 0.00653 | 10.68646                            | 0.18734 | 0.8043786  | 97                     | 2532.5                               | 26.03 | 2453.1                              | 28.78 | 2496.2                              | 16.28                      |  |  |  |  |  |
| 001-98                                          | 0.16377                              | 0.00281 | 0.46512                             | 0.00640 | 10.49320                            | 0.19328 | 0.7470265  | 99                     | 2495.0                               | 28.60 | 2462.1                              | 28.18 | 2479.3                              | 17.08                      |  |  |  |  |  |
| 001-99                                          | 0.11253                              | 0.00193 | 0.33706                             | 0.00475 | 5.22678                             | 0.09603 | 0.7670324  | 102                    | 1840.6                               | 30.76 | 1872.5                              | 22.90 | 1857.0                              | 15.66                      |  |  |  |  |  |
| 001-100                                         | 0.12054                              | 0.00169 | 0.35850                             | 0.00470 | 5.95535                             | 0.09322 | 0.8375426  | 101                    | 1964.2                               | 24.82 | 1975.1                              | 22.29 | 1969.3                              | 13.61                      |  |  |  |  |  |
| 001-103                                         | 0.13146                              | 0.00192 | 0.40318                             | 0.00515 | 7.30537                             | 0.11485 | 0.8124927  | 103                    | 2117.6                               | 25.34 | 2183.7                              | 23.66 | 2149.5                              | 14.04                      |  |  |  |  |  |
| 001-104                                         | 0.13695                              | 0.00286 | 0.41430                             | 0.00647 | 7.81653                             | 0.17041 | 0.7163220  | 102                    | 2189.0                               | 35.80 | 2234.6                              | 29.50 | 2210.1                              | 19.63                      |  |  |  |  |  |
| 001-107                                         | 0.11011                              | 0.00200 | 0.33164                             | 0.00482 | 5.03161                             | 0.09804 | 0.7459055  | 103                    | 1801.2                               | 32.61 | 1846.3                              | 23.33 | 1824.7                              | 16.50                      |  |  |  |  |  |
| 001-108                                         | 0.11224                              | 0.00144 | 0.34926                             | 0.00432 | 5.40293                             | 0.07686 | 0.8694885  | 105                    | 1836.0                               | 23.05 | 1931.0                              | 20.65 | 1885.3                              | 12.19                      |  |  |  |  |  |
| 001-109                                         | 0.11759                              | 0.00302 | 0.35241                             | 0.00597 | 5.70981                             | 0.14718 | 0.6572021  | 101                    | 1919.9                               | 45.40 | 1946.1                              | 28.44 | 1932.9                              | 22.27                      |  |  |  |  |  |
| 001-110                                         | 0.16013                              | 0.00297 | 0.47010                             | 0.00700 | 10.37187                            | 0.20684 | 0.7466728  | 101                    | 2457.0                               | 31.01 | 2484.0                              | 30.69 | 2468.5                              | 18.47                      |  |  |  |  |  |
| 001-111                                         | 0.12251                              | 0.00250 | 0.37717                             | 0.00577 | 6.36634                             | 0.13688 | 0.7115223  | 104                    | 1993.1                               | 35.84 | 2063.1                              | 27.00 | 2027.6                              | 18.87                      |  |  |  |  |  |
| 001-112                                         | 0.11793                              | 0.00221 | 0.36283                             | 0.00518 | 5.89634                             | 0.11500 | 0.7320003  | 104                    | 1925.1                               | 33.15 | 1995.6                              | 24.52 | 1960.7                              | 16.93                      |  |  |  |  |  |
| 001-113                                         | 0.18497                              | 0.00282 | 0.51204                             | 0.00691 | 13.05033                            | 0.21991 | 0.8008491  | 99                     | 2698.0                               | 24.94 | 2665.3                              | 29.46 | 2683.3                              | 15.89                      |  |  |  |  |  |
| 001-114                                         | 0.15694                              | 0.00289 | 0.45526                             | 0.00650 | 9.84710                             | 0.18403 | 0.7639652  | 100                    | 2423.0                               | 30.94 | 2418.6                              | 28.80 | 2420.6                              | 17.23                      |  |  |  |  |  |
| 001-115                                         | 0.13478                              | 0.00292 | 0.39347                             | 0.00616 | 7.30264                             | 0.16670 | 0.6858251  | 99                     | 2161.2                               | 37.26 | 2138.9                              | 28.49 | 2149.1                              | 20.39                      |  |  |  |  |  |
| 001-116                                         | 0.17509                              | 0.00288 | 0.50095                             | 0.00612 | 12.08999                            | 0.20357 | 0.7255531  | 100                    | 2606.9                               | 27.16 | 2617.9                              | 26.28 | 2611.4                              | 15.79                      |  |  |  |  |  |
| 001-117                                         | 0.17668                              | 0.00374 | 0.50351                             | 0.00801 | 12.25309                            | 0.27229 | 0.7158769  | 100                    | 2622.0                               | 34.77 | 2628.8                              | 34.33 | 2624.0                              | 20.86                      |  |  |  |  |  |
| 001-118                                         | 0.17415                              | 0.00262 | 0.49478                             | 0.00672 | 11.87227                            | 0.19906 | 0.8100408  | 100                    | 2597.9                               | 24.90 | 2591.3                              | 28.99 | 2594.4                              | 15.70                      |  |  |  |  |  |
| 001-119                                         | 0.11235                              | 0.00195 | 0.34050                             | 0.00484 | 5.26995                             | 0.09930 | 0.7543719  | 103                    | 1837.7                               | 31.15 | 1889.1                              | 23.27 | 1864.0                              | 16.08                      |  |  |  |  |  |
| 001-120                                         | 0.11222                              | 0.00195 | 0.33364                             | 0.00466 | 5.15905                             | 0.09599 | 0.7506743  | 101                    | 1835.6                               | 31.12 | 1856.0                              | 22.52 | 1845.9                              | 15.83                      |  |  |  |  |  |
| 001-7                                           | 0.11246                              | 0.00158 | 0.36082                             | 0.00455 | 5.59328                             | 0.08405 | 0.8391694  | 108                    | 1839.6                               | 25.24 | 1986.1                              | 21.53 | 1915.1                              | 12.94                      |  |  |  |  |  |
| 001-13                                          | 0.10952                              | 0.00130 | 0.29380                             | 0.00346 | 4.43712                             | 0.05733 | 0.9114724  | 93                     | 1791.4                               | 21.41 | 1660.5                              | 17.23 | 1719.3                              | 10.71                      |  |  |  |  |  |
| 001-14                                          | 0.13267                              | 0.00156 | 0.35333                             | 0.00423 | 6.46426                             | 0.08408 | 0.9204198  | 91                     | 2133.7                               | 20.45 | 1950.5                              | 20.14 | 2041.0                              | 11.44                      |  |  |  |  |  |
| 001-23                                          | 0.13863                              | 0.00191 | 0.36447                             | 0.00519 | 6.96387                             | 0.11418 | 0.8684927  | 91                     | 2210.2                               | 23.76 | 2003.3                              | 24.51 | 2106.8                              | 14.56                      |  |  |  |  |  |
| 001-24                                          | 0.13505                              | 0.00159 | 0.35941                             | 0.00438 | 6.69249                             | 0.08893 | 0.9171141  | 91                     | 2164.7                               | 20.35 | 1979.4                              | 20.78 | 2071.6                              | 11.74                      |  |  |  |  |  |
| 001-27                                          | 0.18371                              | 0.00257 | 0.47308                             | 0.00652 | 11.97921                            | 0.19163 | 0.8615444  | 93                     | 2686.6                               | 22.90 | 2497.0                              | 28.55 | 2602.8                              | 14.99                      |  |  |  |  |  |
| 001-33                                          | 0.10969                              | 0.00161 | 0.35106                             | 0.00410 | 5.30967                             | 0.07838 | 0.7911608  | 108                    | 1794.2                               | 26.51 | 1939.6                              | 19.54 | 1870.4                              | 12.61                      |  |  |  |  |  |
| 001-39                                          | 0.13853                              | 0.00190 | 0.36577                             | 0.00490 | 6.98360                             | 0.10854 | 0.8619410  | 91                     | 2209.0                               | 23.54 | 2009.5                              | 23.13 | 2109.3                              | 13.80                      |  |  |  |  |  |
| 001-46                                          | 0.15803                              | 0.00261 | 0.42009                             | 0.00532 | 9.15138                             | 0.15145 | 0.7652205  | 93                     | 2434.7                               | 27.69 | 2260.9                              | 24.13 | 2353.3                              | 15.15                      |  |  |  |  |  |
| 001-60                                          | 0.15265                              | 0.00231 | 0.39897                             | 0.00556 | 8.39398                             | 0.14180 | 0.8249474  | 91                     | 2375.9                               | 25.57 | 2164.3                              | 25.60 | 2274.5                              | 15.33                      |  |  |  |  |  |
| 001-62                                          | 0.11200                              | 0.00160 | 0.35506                             | 0.00434 | 5.48202                             | 0.08247 | 0.8125173  | 107                    | 1832.2                               | 25.73 | 1958.7                              | 20.66 | 1897.8                              | 12.92                      |  |  |  |  |  |
| 001-64                                          | 0.10890                              | 0.00157 | 0.29007                             | 0.00390 | 4.35387                             | 0.06992 | 0.8372127  | 92                     | 1781.0                               | 26.08 | 1641.9                              | 19.48 | 1703.6                              | 13.26                      |  |  |  |  |  |
| 001-75                                          | 0.14312                              | 0.00243 | 0.37859                             | 0.00533 | 7.46704                             | 0.13511 | 0.7780707  | 91                     | 2265.3                               | 28.97 | 2069.7                              | 24.91 | 2169.0                              | 16.20                      |  |  |  |  |  |
| 001-91                                          | 0.13147                              | 0.00213 | 0.35225                             | 0.00472 | 6.38193                             | 0.10922 | 0.7829623  | 92                     | 2117.7                               | 28.07 | 1945.3                              | 22.52 | 2029.8                              | 15.02                      |  |  |  |  |  |
| 001-102                                         | 0.13673                              | 0.00281 | 0.36832                             | 0.00556 | 6.93712                             | 0.15055 | 0.6955814  | 92                     | 2186.2                               | 35.28 | 2021.5                              | 26.19 | 2103.4                              | 19.26                      |  |  |  |  |  |
| 001-106                                         | 0.10822                              | 0.00171 | 0.33783                             | 0.00416 | 5.03916                             | 0.08300 | 0.7476101  | 106                    | 1769.6                               | 28.68 | 1876.2                              | 20.02 | 1825.9                              | 13.96                      |  |  |  |  |  |
| MS1 - zircon: excluded due to > 10% discordant. |                                      |         |                                     |         |                                     |         |            |                        |                                      |       |                                     |       |                                     |                            |  |  |  |  |  |
| 001-1                                           | 0.26850                              | 0.00343 | 0.43585                             | 0.00551 | 16.12867                            | 0.22914 | 0.         |                        |                                      |       |                                     |       |                                     |                            |  |  |  |  |  |



**Appendix 1** Full compilation of LA-ICP-MS zircon and monazite U–Pb age data

Black = magmatic or detrital analyses, Green = metamorphic analyses, Red = excluded analyses

| Isotopic ratios <sup>1</sup>                        |                                      |         |                                     |         |                                     |         |            |                        |                                      | Age estimates <sup>1</sup> |                                     |       |                                     |       |  |
|-----------------------------------------------------|--------------------------------------|---------|-------------------------------------|---------|-------------------------------------|---------|------------|------------------------|--------------------------------------|----------------------------|-------------------------------------|-------|-------------------------------------|-------|--|
| Spot name                                           | <sup>207</sup> Pb/ <sup>206</sup> Pb | ±1σ     | <sup>206</sup> Pb/ <sup>238</sup> U | ±1σ     | <sup>207</sup> Pb/ <sup>235</sup> U | ±1σ     | <i>rho</i> | Conc. (%) <sup>2</sup> | <sup>207</sup> Pb/ <sup>206</sup> Pb | ±1σ                        | <sup>206</sup> Pb/ <sup>238</sup> U | ±1σ   | <sup>207</sup> Pb/ <sup>235</sup> U | ±1σ   |  |
| 16                                                  | 0.12467                              | 0.00168 | 0.36963                             | 0.00452 | 6.35309                             | 0.09191 | 0.8452661  | 100                    | 2024.1                               | 23.74                      | 2027.7                              | 21.29 | 2025.8                              | 12.69 |  |
| 17                                                  | 0.12520                              | 0.00208 | 0.36862                             | 0.00483 | 6.36384                             | 0.10991 | 0.7586654  | 100                    | 2031.6                               | 29.11                      | 2022.9                              | 22.77 | 2027.3                              | 15.15 |  |
| 20                                                  | 0.11288                              | 0.00160 | 0.31724                             | 0.00390 | 4.93683                             | 0.07431 | 0.8167282  | 96                     | 1846.2                               | 25.46                      | 1776.2                              | 19.06 | 1808.6                              | 12.71 |  |
| 22                                                  | 0.11313                              | 0.00141 | 0.33025                             | 0.00404 | 5.15043                             | 0.07118 | 0.8851646  | 99                     | 1850.3                               | 22.35                      | 1839.6                              | 19.59 | 1844.5                              | 11.75 |  |
| 23                                                  | 0.11655                              | 0.00150 | 0.33983                             | 0.00424 | 5.46048                             | 0.07793 | 0.8742392  | 99                     | 1904.0                               | 22.89                      | 1885.8                              | 20.39 | 1894.4                              | 12.25 |  |
| 25                                                  | 0.15661                              | 0.00197 | 0.44824                             | 0.00548 | 9.67735                             | 0.13419 | 0.8816704  | 99                     | 2419.4                               | 21.19                      | 2387.4                              | 24.39 | 2404.6                              | 12.76 |  |
| 1b                                                  | 0.11225                              | 0.00148 | 0.32963                             | 0.00443 | 5.10302                             | 0.07813 | 0.8777815  | 100                    | 1836.2                               | 23.68                      | 1836.6                              | 21.49 | 1836.6                              | 13.00 |  |
| 3b                                                  | 0.12658                              | 0.00201 | 0.35097                             | 0.00500 | 6.12734                             | 0.10645 | 0.8200235  | 95                     | 2051.1                               | 27.83                      | 1939.2                              | 23.84 | 1994.1                              | 15.17 |  |
| 5b                                                  | 0.11397                              | 0.00138 | 0.33582                             | 0.00418 | 5.27803                             | 0.07264 | 0.9044108  | 100                    | 1863.7                               | 21.68                      | 1866.5                              | 20.19 | 1865.3                              | 11.75 |  |
| 6b                                                  | 0.11123                              | 0.00135 | 0.31796                             | 0.00399 | 4.87704                             | 0.06737 | 0.9084273  | 98                     | 1819.5                               | 21.80                      | 1779.8                              | 19.53 | 1798.3                              | 11.64 |  |
| 8b                                                  | 0.11287                              | 0.00138 | 0.32171                             | 0.00408 | 5.00677                             | 0.07051 | 0.9005390  | 97                     | 1846.1                               | 21.97                      | 1798.1                              | 19.91 | 1820.5                              | 11.92 |  |
| 9b                                                  | 0.11090                              | 0.00132 | 0.31368                             | 0.00385 | 4.79711                             | 0.06469 | 0.9101572  | 97                     | 1814.1                               | 21.47                      | 1758.8                              | 18.89 | 1784.4                              | 11.33 |  |
| 10b                                                 | 0.11272                              | 0.00143 | 0.32516                             | 0.00397 | 5.05340                             | 0.07053 | 0.8747887  | 98                     | 1843.7                               | 22.73                      | 1814.9                              | 19.32 | 1828.3                              | 11.83 |  |
| 14b                                                 | 0.11240                              | 0.00172 | 0.32501                             | 0.00434 | 5.03674                             | 0.08380 | 0.8025988  | 99                     | 1838.5                               | 27.52                      | 1814.1                              | 21.12 | 1825.5                              | 14.09 |  |
| 16b                                                 | 0.11329                              | 0.00154 | 0.31581                             | 0.00397 | 4.93279                             | 0.07345 | 0.8442391  | 95                     | 1852.8                               | 24.37                      | 1769.2                              | 19.45 | 1807.9                              | 12.57 |  |
| 17b                                                 | 0.11477                              | 0.00157 | 0.33161                             | 0.00422 | 5.24716                             | 0.07955 | 0.8394000  | 98                     | 1876.3                               | 24.43                      | 1846.2                              | 20.43 | 1860.3                              | 12.93 |  |
| 18b                                                 | 0.12071                              | 0.00195 | 0.34305                             | 0.00461 | 5.70874                             | 0.09910 | 0.7741232  | 97                     | 1966.7                               | 28.56                      | 1901.3                              | 22.13 | 1932.7                              | 15.00 |  |
| 20b                                                 | 0.11205                              | 0.00179 | 0.33060                             | 0.00434 | 5.10710                             | 0.08756 | 0.7656944  | 100                    | 1833.0                               | 28.66                      | 1841.3                              | 21.03 | 1837.3                              | 14.56 |  |
| 21b                                                 | 0.11269                              | 0.00146 | 0.32230                             | 0.00412 | 5.00633                             | 0.07326 | 0.8735534  | 98                     | 1843.2                               | 23.34                      | 1800.9                              | 20.09 | 1820.4                              | 12.39 |  |
| 22b                                                 | 0.13624                              | 0.00160 | 0.38848                             | 0.00468 | 7.29549                             | 0.09591 | 0.9163635  | 97                     | 2179.9                               | 20.31                      | 2115.8                              | 21.74 | 2148.3                              | 11.74 |  |
| 24b                                                 | 0.11272                              | 0.00160 | 0.32149                             | 0.00407 | 4.99549                             | 0.07666 | 0.8249663  | 97                     | 1843.7                               | 25.52                      | 1797.0                              | 19.87 | 1818.6                              | 12.98 |  |
| 26b                                                 | 0.11002                              | 0.00171 | 0.30217                             | 0.00391 | 4.58084                             | 0.07602 | 0.7797272  | 95                     | 1799.7                               | 27.98                      | 1702.1                              | 19.35 | 1745.8                              | 13.83 |  |
| 27b                                                 | 0.11194                              | 0.00169 | 0.33302                             | 0.00438 | 5.13637                             | 0.08444 | 0.8000403  | 101                    | 1831.2                               | 27.08                      | 1853.0                              | 21.20 | 1842.1                              | 13.97 |  |
| 28b                                                 | 0.11255                              | 0.00144 | 0.32548                             | 0.00391 | 5.04846                             | 0.06957 | 0.8717448  | 99                     | 1841.0                               | 22.98                      | 1816.4                              | 19.03 | 1827.5                              | 11.68 |  |
| 31b                                                 | 0.11682                              | 0.00129 | 0.33989                             | 0.00422 | 5.47170                             | 0.07062 | 0.9619857  | 99                     | 1908.1                               | 19.64                      | 1886.1                              | 20.31 | 1896.2                              | 11.08 |  |
| 32b                                                 | 0.11000                              | 0.00124 | 0.33018                             | 0.00409 | 5.00529                             | 0.06538 | 0.9483243  | 102                    | 1799.3                               | 20.46                      | 1839.2                              | 19.83 | 1820.2                              | 11.05 |  |
| 34b                                                 | 0.11159                              | 0.00133 | 0.33817                             | 0.00432 | 5.20060                             | 0.07155 | 0.9285226  | 103                    | 1825.4                               | 21.40                      | 1877.8                              | 20.82 | 1852.7                              | 11.72 |  |
| 36b                                                 | 0.10699                              | 0.00118 | 0.31279                             | 0.00378 | 4.61304                             | 0.05825 | 0.9570403  | 100                    | 1748.8                               | 19.94                      | 1754.4                              | 18.56 | 1751.6                              | 10.54 |  |
| 37b                                                 | 0.11249                              | 0.00135 | 0.31830                             | 0.00409 | 4.93450                             | 0.06886 | 0.9207947  | 97                     | 1840.0                               | 21.59                      | 1781.4                              | 20.01 | 1808.2                              | 11.78 |  |
| 38b                                                 | 0.10895                              | 0.00120 | 0.31330                             | 0.00382 | 4.70478                             | 0.06001 | 0.9559136  | 99                     | 1781.9                               | 19.99                      | 1756.9                              | 18.76 | 1768.1                              | 10.68 |  |
| 39b                                                 | 0.11061                              | 0.00153 | 0.32413                             | 0.00427 | 4.94055                             | 0.07591 | 0.8574029  | 100                    | 1809.5                               | 24.96                      | 1809.9                              | 20.79 | 1809.2                              | 12.97 |  |
| 41b                                                 | 0.10920                              | 0.00141 | 0.33304                             | 0.00439 | 5.01259                             | 0.07491 | 0.8820445  | 104                    | 1786.0                               | 23.43                      | 1853.1                              | 21.22 | 1821.5                              | 12.65 |  |
| 42b                                                 | 0.17173                              | 0.00198 | 0.47347                             | 0.00591 | 11.20608                            | 0.14941 | 0.9362009  | 97                     | 2574.5                               | 19.11                      | 2498.7                              | 25.85 | 2540.4                              | 12.43 |  |
| 44b                                                 | 0.13884                              | 0.00181 | 0.38800                             | 0.00510 | 7.42553                             | 0.11011 | 0.8864192  | 96                     | 2212.7                               | 22.47                      | 2113.5                              | 23.70 | 2164.1                              | 13.27 |  |
| 45b                                                 | 0.11163                              | 0.00154 | 0.33216                             | 0.00446 | 5.11089                             | 0.08036 | 0.8539730  | 101                    | 1826.1                               | 24.75                      | 1848.8                              | 21.60 | 1837.9                              | 13.35 |  |
| 46b                                                 | 0.13299                              | 0.00188 | 0.37408                             | 0.00511 | 6.85777                             | 0.11010 | 0.8508480  | 96                     | 2137.9                               | 24.58                      | 2048.6                              | 23.99 | 2093.2                              | 14.23 |  |
| 47b                                                 | 0.11252                              | 0.00147 | 0.32644                             | 0.00426 | 5.06311                             | 0.07538 | 0.8765314  | 99                     | 1840.4                               | 23.47                      | 1821.1                              | 20.69 | 1829.9                              | 12.62 |  |
| 48b                                                 | 0.11140                              | 0.00198 | 0.31642                             | 0.00424 | 4.85782                             | 0.08845 | 0.7359453  | 97                     | 1822.3                               | 31.91                      | 1772.2                              | 20.76 | 1795.0                              | 15.33 |  |
| 49b                                                 | 0.11641                              | 0.00155 | 0.36780                             | 0.00486 | 5.90302                             | 0.09028 | 0.8639871  | 106                    | 1901.8                               | 23.77                      | 2019.0                              | 22.92 | 1961.7                              | 13.28 |  |
| 51b                                                 | 0.11353                              | 0.00174 | 0.34353                             | 0.00478 | 5.37716                             | 0.09241 | 0.8096498  | 103                    | 1856.7                               | 27.40                      | 1903.6                              | 22.93 | 1881.2                              | 14.71 |  |
| 52b                                                 | 0.11025                              | 0.00171 | 0.31673                             | 0.00440 | 4.81534                             | 0.08359 | 0.8002692  | 98                     | 1803.6                               | 27.94                      | 1773.7                              | 21.56 | 1787.6                              | 14.60 |  |
| 53b                                                 | 0.13720                              | 0.00187 | 0.40939                             | 0.00531 | 7.74299                             | 0.11899 | 0.8440254  | 101                    | 2192.1                               | 23.53                      | 2212.1                              | 24.30 | 2201.6                              | 13.82 |  |
| 54b                                                 | 0.10995                              | 0.00223 | 0.32888                             | 0.00504 | 4.98439                             | 0.10767 | 0.7094313  | 102                    | 1798.5                               | 36.52                      | 1832.9                              | 24.44 | 1816.7                              | 18.27 |  |
| 11b                                                 | 0.11059                              | 0.00136 | 0.29732                             | 0.00363 | 4.53316                             | 0.06233 | 0.8879457  | 93                     | 1809.1                               | 22.20                      | 1678.0                              | 18.05 | 1737.1                              | 11.44 |  |
| 13b                                                 | 0.10987                              | 0.00138 | 0.29410                             | 0.00355 | 4.45438                             | 0.06151 | 0.8741277  | 92                     | 1797.2                               | 22.66                      | 1662.0                              | 17.71 | 1722.5                              | 11.45 |  |
| 25b                                                 | 0.13630                              | 0.00187 | 0.37661                             | 0.00474 | 7.07542                             | 0.10566 | 0.8428070  | 94                     | 2180.7                               | 23.73                      | 2060.4                              | 22.18 | 2121.0                              | 13.29 |  |
| 4b                                                  | 0.11070                              | 0.00136 | 0.35467                             | 0.00436 | 5.41409                             | 0.07390 | 0.9006231  | 108                    | 1811.0                               | 22.10                      | 1956.9                              | 20.77 | 1887.1                              | 11.70 |  |
| 30b                                                 | 0.15513                              | 0.00243 | 0.41421                             | 0.00553 | 8.85432                             | 0.14980 | 0.7891289  | 93                     | 2403.3                               | 26.41                      | 2234.1                              | 25.20 | 2323.1                              | 15.44 |  |
| MS2 - zircon: used for metamorphic age calculation. |                                      |         |                                     |         |                                     |         |            |                        |                                      |                            |                                     |       |                                     |       |  |
| 7                                                   | 0.09542                              | 0.00135 | 0.27117                             | 0.00350 | 3.56677                             | 0.05527 | 0.8329368  | 101                    | 1536.4                               | 26.30                      | 1546.7                              | 17.76 | 1542.2                              | 12.29 |  |
| 9                                                   | 0.09788                              | 0.00152 | 0.27929                             | 0.00363 | 3.76881                             | 0.06259 | 0.7826193  | 100                    | 1584.2                               | 28.71                      | 1587.8                              | 18.31 | 1586.1                              | 13.33 |  |
| 11                                                  | 0.09748                              | 0.00122 | 0.28312                             | 0.00344 | 3.80501                             | 0.05227 | 0.8844865  | 102                    | 1576.5                               | 23.26                      | 1607.1                              | 17.27 | 1593.8                              | 11.05 |  |
| 12                                                  | 0.09691                              | 0.00137 | 0.28188                             | 0.00359 | 3.76593                             | 0.05775 | 0.8305207  | 102                    | 1565.4                               | 26.25                      | 1600.8                              | 18.07 | 1585.5                              | 12.30 |  |
| 13                                                  | 0.09750                              | 0.00127 | 0.27877                             | 0.00333 | 3.74732                             | 0.05234 | 0.8552346  | 101                    | 1576.8                               | 24.24                      | 1585.2                              | 16.78 | 1581.5                              | 11.19 |  |
| 14                                                  | 0.09626                              | 0.00126 | 0.27054                             | 0.00325 | 3.59031                             | 0.05036 | 0.8564423  | 99                     | 1552.8                               | 24.34                      | 1543.5                              | 16.49 | 1547.4                              | 11.14 |  |
| 24                                                  | 0.09614                              | 0.00121 | 0.26762                             | 0.00320 | 3.54698                             | 0.04841 | 0.8761028  | 99                     | 1550.5                               | 23.52                      | 1528.7                              | 16.28 | 1537.8                              | 10.81 |  |
| 26                                                  | 0.09520                              | 0.00115 | 0.27598                             | 0.00331 | 3.62217                             | 0.04834 | 0.8986955  | 103                    | 1532.0                               | 22.67                      | 1571.1                              | 16.70 | 1554.4                              | 10.62 |  |
| 27                                                  | 0.09716                              | 0.00142 | 0.26195                             | 0.00302 | 3.50879                             | 0.05225 | 0.7742115  | 96                     | 1570.3                               | 27.20                      | 1499.8                              | 15.43 | 1529.2                              | 11.77 |  |
| 28                                                  | 0.09684                              | 0.00117 | 0.26895                             | 0.00315 | 3.59073                             | 0.04712 | 0.8925170  | 98                     | 1564.1                               | 22.56                      | 1535.5                              | 15.99 | 1547.5                              | 10.42 |  |
| 33                                                  | 0.09770                              | 0.00121 | 0.26859                             | 0.00307 | 3.61788                             | 0.04734 | 0.8735232  | 97                     | 1580.6                               | 22.96                      | 1533.6                              | 15.59 | 1553.5                              | 10.41 |  |
| 2b                                                  | 0.09852                              | 0.00119 | 0.26489                             |         |                                     |         |            |                        |                                      |                            |                                     |       |                                     |       |  |

**Appendix 1** Full compilation of LA-ICP-MS zircon and monazite U–Pb age data

Black = magmatic or detrital analyses, Green = metamorphic analyses, Red = excluded analyses

| Isotopic ratios <sup>1</sup>                             |                                      |         |                                     |         |                                     |         |           |                        |                                      |       |                                     |       |                                     | Age estimates <sup>1</sup> |  |  |  |  |  |
|----------------------------------------------------------|--------------------------------------|---------|-------------------------------------|---------|-------------------------------------|---------|-----------|------------------------|--------------------------------------|-------|-------------------------------------|-------|-------------------------------------|----------------------------|--|--|--|--|--|
| Spot name                                                | <sup>207</sup> Pb/ <sup>206</sup> Pb | ±1σ     | <sup>206</sup> Pb/ <sup>238</sup> U | ±1σ     | <sup>207</sup> Pb/ <sup>235</sup> U | ±1σ     | rho       | Conc. (%) <sup>2</sup> | <sup>207</sup> Pb/ <sup>206</sup> Pb | ±1σ   | <sup>206</sup> Pb/ <sup>238</sup> U | ±1σ   | <sup>207</sup> Pb/ <sup>235</sup> U | ±1σ                        |  |  |  |  |  |
| 18                                                       | 0.10730                              | 0.00136 | 0.31939                             | 0.00379 | 4.72473                             | 0.06461 | 0.8677511 | 102                    | 1754.0                               | 23.03 | 1786.8                              | 18.53 | 1771.6                              | 11.46                      |  |  |  |  |  |
| 19                                                       | 0.10743                              | 0.00178 | 0.31752                             | 0.00410 | 4.70334                             | 0.08127 | 0.7472895 | 101                    | 1756.3                               | 29.96 | 1777.6                              | 20.08 | 1767.8                              | 14.47                      |  |  |  |  |  |
| 21                                                       | 0.11169                              | 0.00137 | 0.31751                             | 0.00378 | 4.88905                             | 0.06497 | 0.8958721 | 97                     | 1827.1                               | 22.07 | 1777.6                              | 18.49 | 1800.4                              | 11.20                      |  |  |  |  |  |
| 12b                                                      | 0.10759                              | 0.00147 | 0.30458                             | 0.00384 | 4.51845                             | 0.06744 | 0.8446986 | 97                     | 1759.1                               | 24.64 | 1714.0                              | 18.97 | 1734.4                              | 12.41                      |  |  |  |  |  |
| 43b                                                      | 0.10722                              | 0.00131 | 0.30869                             | 0.00402 | 4.56240                             | 0.06523 | 0.9108555 | 99                     | 1752.7                               | 22.06 | 1734.3                              | 19.80 | 1742.4                              | 11.91                      |  |  |  |  |  |
| MF1 - Zircon: analyses used in magmatic age calculation. |                                      |         |                                     |         |                                     |         |           |                        |                                      |       |                                     |       |                                     |                            |  |  |  |  |  |
| Z01                                                      | 0.11002                              | 0.00143 | 4.82905                             | 0.06740 | 0.31829                             | 0.00377 | 0.8486335 | 99                     | 1799.6                               | 23.40 | 1781.4                              | 18.45 | 1790.0                              | 11.74                      |  |  |  |  |  |
| Z02                                                      | 0.10774                              | 0.00164 | 4.38837                             | 0.06890 | 0.29537                             | 0.00354 | 0.7633451 | 95                     | 1761.5                               | 27.45 | 1668.3                              | 17.61 | 1710.2                              | 12.98                      |  |  |  |  |  |
| Z03                                                      | 0.10833                              | 0.00166 | 4.65367                             | 0.07323 | 0.31152                             | 0.00368 | 0.7507035 | 99                     | 1771.4                               | 27.70 | 1748.2                              | 18.11 | 1759.0                              | 13.15                      |  |  |  |  |  |
| Z04                                                      | 0.11002                              | 0.00157 | 4.68336                             | 0.07115 | 0.30872                             | 0.00376 | 0.8016886 | 96                     | 1799.7                               | 25.80 | 1734.4                              | 18.51 | 1764.3                              | 12.71                      |  |  |  |  |  |
| Z05                                                      | 0.10688                              | 0.00165 | 4.61159                             | 0.07377 | 0.31283                             | 0.00374 | 0.7473673 | 100                    | 1746.9                               | 27.98 | 1754.6                              | 18.34 | 1751.4                              | 13.35                      |  |  |  |  |  |
| Z06                                                      | 0.10964                              | 0.00165 | 4.68638                             | 0.07340 | 0.30995                             | 0.00369 | 0.7601095 | 97                     | 1793.4                               | 27.22 | 1740.4                              | 18.15 | 1764.8                              | 13.11                      |  |  |  |  |  |
| Z07                                                      | 0.10880                              | 0.00178 | 4.70832                             | 0.07908 | 0.31378                             | 0.00381 | 0.7229346 | 99                     | 1779.4                               | 29.67 | 1759.3                              | 18.69 | 1768.7                              | 14.07                      |  |  |  |  |  |
| Z09                                                      | 0.10977                              | 0.00162 | 4.75347                             | 0.07308 | 0.31407                             | 0.00371 | 0.7683510 | 98                     | 1795.6                               | 26.68 | 1760.7                              | 18.20 | 1776.7                              | 12.90                      |  |  |  |  |  |
| Z10                                                      | 0.11123                              | 0.00204 | 5.02256                             | 0.09669 | 0.32773                             | 0.00449 | 0.7116619 | 100                    | 1819.5                               | 32.96 | 1827.4                              | 21.78 | 1823.1                              | 16.30                      |  |  |  |  |  |
| Z11                                                      | 0.10844                              | 0.00166 | 4.67529                             | 0.07503 | 0.31270                             | 0.00391 | 0.7791525 | 99                     | 1773.4                               | 27.77 | 1754.0                              | 19.18 | 1762.8                              | 13.42                      |  |  |  |  |  |
| Z12                                                      | 0.10919                              | 0.00149 | 4.76779                             | 0.06902 | 0.31672                             | 0.00380 | 0.8288010 | 99                     | 1785.8                               | 24.78 | 1773.7                              | 18.59 | 1779.2                              | 12.15                      |  |  |  |  |  |
| Z13                                                      | 0.10830                              | 0.00158 | 4.60063                             | 0.07038 | 0.30812                             | 0.00376 | 0.7976934 | 98                     | 1770.9                               | 26.50 | 1731.4                              | 18.53 | 1749.4                              | 12.76                      |  |  |  |  |  |
| Z14                                                      | 0.11027                              | 0.00174 | 4.76694                             | 0.07547 | 0.31362                             | 0.00368 | 0.7411556 | 97                     | 1803.9                               | 28.34 | 1758.5                              | 18.05 | 1779.1                              | 13.29                      |  |  |  |  |  |
| Z15                                                      | 0.11046                              | 0.00147 | 4.81620                             | 0.06585 | 0.31632                             | 0.00356 | 0.8231369 | 98                     | 1807.0                               | 23.95 | 1771.7                              | 17.44 | 1787.7                              | 11.50                      |  |  |  |  |  |
| Z16                                                      | 0.10708                              | 0.00140 | 4.51105                             | 0.06102 | 0.30561                             | 0.00345 | 0.8345589 | 98                     | 1750.4                               | 23.60 | 1719.1                              | 17.05 | 1733.0                              | 11.24                      |  |  |  |  |  |
| Z17                                                      | 0.10721                              | 0.00164 | 4.55027                             | 0.07198 | 0.30784                             | 0.00375 | 0.7700724 | 99                     | 1752.6                               | 27.69 | 1730.1                              | 18.48 | 1740.2                              | 13.17                      |  |  |  |  |  |
| Z19                                                      | 0.10681                              | 0.00129 | 4.72876                             | 0.06226 | 0.32117                             | 0.00377 | 0.8915476 | 103                    | 1745.7                               | 21.92 | 1795.5                              | 18.41 | 1772.4                              | 11.03                      |  |  |  |  |  |
| Z18                                                      | 0.10913                              | 0.00145 | 4.60461                             | 0.06336 | 0.30610                             | 0.00347 | 0.8238418 | 96                     | 1784.9                               | 24.09 | 1721.5                              | 17.14 | 1750.1                              | 11.48                      |  |  |  |  |  |
| Z20                                                      | 0.10773                              | 0.00142 | 4.67458                             | 0.06502 | 0.31474                             | 0.00368 | 0.8406041 | 100                    | 1761.4                               | 23.78 | 1764.0                              | 18.04 | 1762.7                              | 11.63                      |  |  |  |  |  |
| Z21                                                      | 0.10863                              | 0.00131 | 4.64436                             | 0.06096 | 0.31013                             | 0.00364 | 0.8942079 | 98                     | 1776.5                               | 21.82 | 1741.4                              | 17.89 | 1757.3                              | 10.97                      |  |  |  |  |  |
| Z22                                                      | 0.10830                              | 0.00137 | 4.55649                             | 0.06197 | 0.30520                             | 0.00362 | 0.8721134 | 97                     | 1770.9                               | 22.88 | 1717.0                              | 17.87 | 1741.3                              | 11.32                      |  |  |  |  |  |
| Z23                                                      | 0.11021                              | 0.00186 | 4.94651                             | 0.08597 | 0.32576                             | 0.00412 | 0.7276984 | 101                    | 1802.9                               | 30.40 | 1817.8                              | 20.02 | 1810.2                              | 14.68                      |  |  |  |  |  |
| Z25                                                      | 0.10622                              | 0.00137 | 4.59171                             | 0.06157 | 0.30414                             | 0.00354 | 0.8680306 | #REF!                  | 1733.4                               | 23.22 | 1703.1                              | 17.60 | 1747.8                              | 11.18                      |  |  |  |  |  |
| Z26                                                      | 0.10951                              | 0.00137 | 4.42239                             | 0.06054 | 0.30237                             | 0.00356 | 0.8600544 | 98                     | 1773.8                               | 30.93 | 1774.7                              | 18.32 | 1716.5                              | 11.34                      |  |  |  |  |  |
| Z27                                                      | 0.10610                              | 0.00135 | 4.73852                             | 0.08058 | 0.31694                             | 0.00374 | 0.6939210 | 100                    | 1771.9                               | 26.85 | 1810.5                              | 18.87 | 1774.1                              | 14.26                      |  |  |  |  |  |
| Z28                                                      | 0.10847                              | 0.00185 | 4.84353                             | 0.07437 | 0.32425                             | 0.00388 | 0.7793202 | 102                    | 1772.6                               | 29.37 | 1733.4                              | 17.86 | 1792.5                              | 12.92                      |  |  |  |  |  |
| Z29                                                      | 0.10836                              | 0.00161 | 4.61160                             | 0.07519 | 0.30851                             | 0.00363 | 0.7216538 | 98                     | 1776.4                               | 24.84 | 1700.4                              | 17.43 | 1751.4                              | 13.61                      |  |  |  |  |  |
| Z30                                                      | 0.10840                              | 0.00176 | 4.52004                             | 0.06463 | 0.30183                             | 0.00352 | 0.8156210 | 96                     | 1735.4                               | 23.43 | 1600.9                              | 16.55 | 1734.7                              | 11.89                      |  |  |  |  |  |
| 1                                                        | 0.10825                              | 0.00127 | 4.45736                             | 0.05837 | 0.29872                             | 0.00356 | 0.9100677 | 95                     | 1770.1                               | 21.37 | 1685.0                              | 17.65 | 1723.1                              | 10.86                      |  |  |  |  |  |
| 2                                                        | 0.10844                              | 0.00126 | 4.61105                             | 0.06034 | 0.30846                             | 0.00372 | 0.9215918 | 98                     | 1773.2                               | 21.09 | 1733.1                              | 18.31 | 1751.3                              | 10.92                      |  |  |  |  |  |
| 4                                                        | 0.10776                              | 0.00132 | 4.46132                             | 0.06503 | 0.30022                             | 0.00400 | 0.9140501 | 96                     | 1761.9                               | 22.20 | 1692.4                              | 19.85 | 1723.8                              | 12.09                      |  |  |  |  |  |
| 5                                                        | 0.10783                              | 0.00119 | 4.75568                             | 0.06041 | 0.31992                             | 0.00387 | 0.9522991 | 101                    | 1763.0                               | 19.96 | 1789.3                              | 18.91 | 1777.1                              | 10.66                      |  |  |  |  |  |
| 6                                                        | 0.10840                              | 0.00142 | 4.75189                             | 0.07224 | 0.31788                             | 0.00428 | 0.8856644 | 100                    | 1772.7                               | 23.72 | 1779.4                              | 20.94 | 1776.4                              | 12.75                      |  |  |  |  |  |
| 7                                                        | 0.11065                              | 0.00123 | 4.76262                             | 0.06125 | 0.31223                             | 0.00382 | 0.9513243 | 97                     | 1810.0                               | 20.01 | 1751.7                              | 18.78 | 1778.3                              | 10.79                      |  |  |  |  |  |
| 9                                                        | 0.10830                              | 0.00118 | 4.56486                             | 0.05869 | 0.30575                             | 0.00377 | 0.9590433 | 97                     | 1770.9                               | 19.80 | 1719.7                              | 18.63 | 1742.9                              | 10.71                      |  |  |  |  |  |
| 11                                                       | 0.10947                              | 0.00124 | 4.75477                             | 0.06369 | 0.31511                             | 0.00397 | 0.9405602 | 99                     | 1790.5                               | 20.50 | 1765.8                              | 19.47 | 1776.9                              | 11.24                      |  |  |  |  |  |
| 12                                                       | 0.10797                              | 0.00123 | 4.57776                             | 0.06100 | 0.30755                             | 0.00385 | 0.9394381 | 98                     | 1765.5                               | 20.56 | 1728.6                              | 18.96 | 1745.2                              | 11.10                      |  |  |  |  |  |
| 15                                                       | 0.10939                              | 0.00125 | 4.71844                             | 0.06302 | 0.31287                             | 0.00390 | 0.9332988 | 98                     | 1789.3                               | 20.75 | 1754.8                              | 19.16 | 1770.5                              | 11.19                      |  |  |  |  |  |
| 16                                                       | 0.10762                              | 0.00124 | 4.92316                             | 0.06631 | 0.33186                             | 0.00416 | 0.9306863 | 105                    | 1759.5                               | 20.92 | 1847.4                              | 20.12 | 1806.2                              | 11.37                      |  |  |  |  |  |
| 17                                                       | 0.10783                              | 0.00122 | 4.67091                             | 0.06271 | 0.31425                             | 0.00397 | 0.9409790 | 100                    | 1763.1                               | 20.53 | 1761.6                              | 19.46 | 1762.0                              | 11.23                      |  |  |  |  |  |
| 18                                                       | 0.10806                              | 0.00156 | 4.73355                             | 0.07677 | 0.31784                             | 0.00425 | 0.8244718 | 101                    | 1766.9                               | 26.25 | 1779.2                              | 20.80 | 1773.2                              | 13.59                      |  |  |  |  |  |
| 21                                                       | 0.10868                              | 0.00117 | 4.58187                             | 0.05583 | 0.30578                             | 0.00359 | 0.9635195 | 97                     | 1777.4                               | 19.62 | 1719.9                              | 17.70 | 1746.0                              | 10.16                      |  |  |  |  |  |
| 23                                                       | 0.10849                              | 0.00132 | 4.63222                             | 0.06471 | 0.30967                             | 0.00395 | 0.9130945 | 98                     | 1774.2                               | 22.09 | 1739.1                              | 19.43 | 1755.1                              | 11.67                      |  |  |  |  |  |
| 24                                                       | 0.10582                              | 0.00121 | 4.38235                             | 0.05342 | 0.30036                             | 0.00338 | 0.9231617 | 98                     | 1728.6                               | 20.79 | 1693.1                              | 16.75 | 1709.0                              | 10.08                      |  |  |  |  |  |
| 27                                                       | 0.10849                              | 0.00128 | 4.60464                             | 0.05692 | 0.30782                             | 0.00342 | 0.8987938 | 98                     | 1774.2                               | 21.41 | 1730.0                              | 16.86 | 1750.1                              | 10.31                      |  |  |  |  |  |
| 28                                                       | 0.10853                              | 0.00118 | 4.60808                             | 0.05554 | 0.30796                             | 0.00355 | 0.9564190 | 98                     | 1774.8                               | 19.75 | 1730.7                              | 17.49 | 1750.7                              | 10.06                      |  |  |  |  |  |
| 29                                                       | 0.10834                              | 0.00118 | 4.61671                             | 0.05657 | 0.30910                             | 0.00362 | 0.9557757 | 98                     | 1771.6                               | 19.75 | 1736.3                              | 17.84 | 1752.3                              | 10.23                      |  |  |  |  |  |
| 32                                                       | 0.10863                              | 0.00127 | 4.52304                             | 0.05723 | 0.30199                             | 0.00349 | 0.9133549 | 96                     | 1776.6                               | 21.23 | 1701.2                              | 17.27 | 1735.2                              | 10.52                      |  |  |  |  |  |
| 33                                                       | 0.10863                              | 0.00144 | 4.49870                             | 0.06541 | 0.30037                             | 0.00376 | 0.8609426 | 95                     | 1776.5                               | 24.07 | 1693.2                              | 18.63 | 1730.7                              | 12.08                      |  |  |  |  |  |
| 35                                                       | 0.10869                              | 0.00123 | 4.55163                             | 0.05620 | 0.30374                             | 0.00349 | 0.9305808 | 96                     | 1777.5                               | 20.58 | 1709.8                              | 17.26 | 1740.5                              | 10.28                      |  |  |  |  |  |
| 36                                                       | 0.10940                              | 0.00124 | 4.54677                             | 0.05594 | 0.30144                             | 0.00345 | 0.9302480 | 95                     | 1789.5                               | 20.53 | 1698.5                              | 17.09 | 1739.6                              | 10.24                      |  |  |  |  |  |
| 42                                                       | 0.10682                              | 0.00124 | 4.61226                             | 0.05860 | 0.31319                             | 0.00368 | 0.9248176 | 101                    | 1745.8                               | 20.96 | 1756.4                              | 18.05 | 1751.5                              | 10.60                      |  |  |  |  |  |
| 43                                                       | 0.10737                              | 0.00117 | 4.47523                             | 0.05359 | 0.30230                             | 0.00346 | 0.9558056 | 97                     | 1755.2                               | 19.71 | 1702.7                              | 17.12 | 1726.4                              | 9.94                       |  |  |  |  |  |
| 44                                                       | 0.10797                              | 0.00135 | 4.86922                             | 0.06756 | 0.32713                             | 0.00405 | 0.8922867 | 103                    | 1765.5                               | 22.55 | 1824.5                              | 19.69 | 1796.9                              | 11.69                      |  |  |  |  |  |
| 45                                                       | 0.10744                              | 0.00118 | 4.64251                             |         |                                     |         |           |                        |                                      |       |                                     |       |                                     |                            |  |  |  |  |  |

**Appendix 1** Full compilation of LA-ICP-MS zircon and monazite U–Pb age data

Black = magmatic or detrital analyses, Green = metamorphic analyses, Red = excluded analyses

| Isotopic ratios <sup>1</sup>                                                     |                                      |         |                                     |         |                                     |         |           |                        | Age estimates <sup>1</sup>           |       |                                     |       |                                     |       |
|----------------------------------------------------------------------------------|--------------------------------------|---------|-------------------------------------|---------|-------------------------------------|---------|-----------|------------------------|--------------------------------------|-------|-------------------------------------|-------|-------------------------------------|-------|
| Spot name                                                                        | <sup>207</sup> Pb/ <sup>206</sup> Pb | ±1σ     | <sup>206</sup> Pb/ <sup>238</sup> U | ±1σ     | <sup>207</sup> Pb/ <sup>235</sup> U | ±1σ     | rho       | Conc. (%) <sup>2</sup> | <sup>207</sup> Pb/ <sup>206</sup> Pb | ±1σ   | <sup>206</sup> Pb/ <sup>238</sup> U | ±1σ   | <sup>207</sup> Pb/ <sup>235</sup> U | ±1σ   |
| 66                                                                               | 0.10745                              | 0.00122 | 4.65987                             | 0.05725 | 0.31452                             | 0.00359 | 0.9290616 | 100                    | 1756.7                               | 20.54 | 1762.9                              | 17.60 | 1760.1                              | 10.27 |
| 67                                                                               | 0.10944                              | 0.00135 | 4.54493                             | 0.06068 | 0.30121                             | 0.00356 | 0.8852425 | 95                     | 1790.1                               | 22.36 | 1697.3                              | 17.65 | 1739.2                              | 11.11 |
| 68                                                                               | 0.10810                              | 0.00124 | 4.48215                             | 0.05593 | 0.30074                             | 0.00346 | 0.9219906 | 96                     | 1767.5                               | 20.92 | 1695.0                              | 17.12 | 1727.7                              | 10.36 |
| MF1 - zircon: excluded due to > 5% discordant.                                   |                                      |         |                                     |         |                                     |         |           |                        |                                      |       |                                     |       |                                     |       |
| Z08                                                                              | 0.11160                              | 0.00184 | 4.46167                             | 0.07459 | 0.28998                             | 0.00343 | 0.7075268 | 90                     | 1825.7                               | 29.58 | 1641.4                              | 17.12 | 1723.9                              | 13.87 |
| Z24                                                                              | 0.10862                              | 0.00149 | 4.12752                             | 0.05666 | 0.28189                             | 0.00329 | 0.8502152 | 92                     | 1791.3                               | 22.63 | 1711.8                              | 17.50 | 1659.8                              | 11.22 |
| 3                                                                                | 0.10861                              | 0.00130 | 5.15155                             | 0.06859 | 0.34408                             | 0.00416 | 0.9080526 | 107                    | 1776.1                               | 21.71 | 1906.3                              | 19.95 | 1844.7                              | 11.32 |
| 10                                                                               | 0.10778                              | 0.00122 | 5.02552                             | 0.06518 | 0.33821                             | 0.00412 | 0.9392418 | 107                    | 1762.2                               | 20.43 | 1878.0                              | 19.85 | 1823.6                              | 10.98 |
| 19                                                                               | 0.10828                              | 0.00125 | 5.20977                             | 0.07090 | 0.34905                             | 0.00442 | 0.9304798 | 109                    | 1770.6                               | 21.03 | 1930.0                              | 21.11 | 1854.2                              | 11.59 |
| 20                                                                               | 0.10737                              | 0.00122 | 4.93730                             | 0.06708 | 0.33359                             | 0.00426 | 0.9399246 | 106                    | 1755.2                               | 20.62 | 1855.7                              | 20.60 | 1808.7                              | 11.47 |
| 25                                                                               | 0.10650                              | 0.00120 | 4.21667                             | 0.05098 | 0.28715                             | 0.00323 | 0.9303867 | 94                     | 1740.4                               | 20.54 | 1627.3                              | 16.17 | 1677.3                              | 9.92  |
| 26                                                                               | 0.10827                              | 0.00117 | 4.42149                             | 0.05276 | 0.29618                             | 0.00340 | 0.9620265 | 94                     | 1770.5                               | 19.57 | 1672.3                              | 16.89 | 1716.4                              | 9.88  |
| 30                                                                               | 0.10996                              | 0.00120 | 4.54625                             | 0.05495 | 0.29988                             | 0.00346 | 0.9545841 | 94                     | 1798.6                               | 19.67 | 1690.7                              | 17.17 | 1739.5                              | 10.06 |
| 37                                                                               | 0.10858                              | 0.00139 | 4.41191                             | 0.05878 | 0.29470                             | 0.00337 | 0.8583152 | 94                     | 1775.6                               | 23.16 | 1665.0                              | 16.79 | 1714.6                              | 11.03 |
| 38                                                                               | 0.10920                              | 0.00126 | 4.46950                             | 0.05520 | 0.29686                             | 0.00337 | 0.9191747 | 94                     | 1786.1                               | 20.88 | 1675.7                              | 16.76 | 1725.3                              | 10.25 |
| 39                                                                               | 0.10953                              | 0.00126 | 4.37877                             | 0.05427 | 0.28997                             | 0.00331 | 0.9210161 | 92                     | 1791.6                               | 20.82 | 1641.4                              | 16.55 | 1708.3                              | 10.25 |
| 47                                                                               | 0.10828                              | 0.00125 | 4.94040                             | 0.05863 | 0.33091                             | 0.00358 | 0.9116232 | 105                    | 1770.6                               | 20.89 | 1842.8                              | 17.35 | 1809.2                              | 10.02 |
| 53                                                                               | 0.11062                              | 0.00135 | 4.45206                             | 0.05492 | 0.29193                             | 0.00315 | 0.8747064 | 91                     | 1809.6                               | 21.94 | 1651.2                              | 15.72 | 1722.1                              | 10.23 |
| MF1 - zircon: analyses excluded from calculations due to ambiguous spot location |                                      |         |                                     |         |                                     |         |           |                        |                                      |       |                                     |       |                                     |       |
| 13                                                                               | 0.10655                              | 0.00119 | 4.62679                             | 0.06083 | 0.31499                             | 0.00391 | 0.9461621 | 89                     | 1617.3                               | 20.28 | 1442.8                              | 14.46 | 1770.5                              | 11.19 |
| 14                                                                               | 0.10743                              | 0.00120 | 4.94369                             | 0.06529 | 0.33384                             | 0.00418 | 0.9441521 | 101                    | 1741.4                               | 20.34 | 1765.2                              | 19.17 | 1806.2                              | 11.37 |
| 22                                                                               | 0.09963                              | 0.00109 | 3.44587                             | 0.04080 | 0.25083                             | 0.00281 | 0.9470242 | 99                     | 1788.8                               | 20.05 | 1769.7                              | 17.95 | 1709.0                              | 10.08 |
| 31                                                                               | 0.10936                              | 0.00121 | 4.76315                             | 0.05843 | 0.31591                             | 0.00367 | 0.9412798 | 91                     | 1779.7                               | 20.18 | 1619.1                              | 16.45 | 1730.7                              | 12.08 |
| 34                                                                               | 0.10882                              | 0.00121 | 4.28368                             | 0.05228 | 0.28552                             | 0.00328 | 0.9703401 | 100                    | 1735.9                               | 19.26 | 1741.0                              | 17.02 | 1739.6                              | 10.24 |
| 41                                                                               | 0.10624                              | 0.00112 | 4.54165                             | 0.05223 | 0.31006                             | 0.00346 | 0.8761989 | 101                    | 1757.0                               | 22.17 | 1779.8                              | 17.20 | 1726.4                              | 9.94  |
| 52                                                                               | 0.10747                              | 0.00132 | 4.71160                             | 0.05953 | 0.31796                             | 0.00352 | 0.9113066 | 106                    | 1730.5                               | 21.05 | 1837.3                              | 17.81 | 1782.8                              | 12.00 |
| 64                                                                               | 0.10593                              | 0.00122 | 4.81668                             | 0.05882 | 0.32978                             | 0.00367 | 0.9480745 | 106                    | 1756.2                               | 20.24 | 1857.0                              | 20.18 | 1760.1                              | 10.27 |
| MF2 - Zircon: analyses used in magmatic age calculation.                         |                                      |         |                                     |         |                                     |         |           |                        |                                      |       |                                     |       |                                     |       |
| Z03_1                                                                            | 0.10923                              | 0.00130 | 0.31708                             | 0.00431 | 4.77395                             | 0.07013 | 0.9252998 | 99                     | 1786.5                               | 21.60 | 1775.5                              | 21.09 | 1780.3                              | 12.33 |
| Z05_1                                                                            | 0.10834                              | 0.00134 | 0.30889                             | 0.00417 | 4.61307                             | 0.06860 | 0.9078166 | 98                     | 1771.6                               | 22.39 | 1735.2                              | 20.54 | 1751.6                              | 12.41 |
| Z06_2                                                                            | 0.10744                              | 0.00132 | 0.29601                             | 0.00388 | 4.38385                             | 0.06322 | 0.9089218 | 95                     | 1756.5                               | 22.21 | 1671.5                              | 19.28 | 1709.3                              | 11.92 |
| Z08_1                                                                            | 0.10944                              | 0.00129 | 0.31506                             | 0.00416 | 4.75292                             | 0.06752 | 0.9294545 | 99                     | 1790.0                               | 21.31 | 1765.5                              | 20.39 | 1776.6                              | 11.92 |
| Z12_1                                                                            | 0.10873                              | 0.00126 | 0.32433                             | 0.00412 | 4.86198                             | 0.06629 | 0.9316982 | 102                    | 1778.2                               | 21.02 | 1810.8                              | 20.07 | 1795.7                              | 11.48 |
| Z14_1                                                                            | 0.10710                              | 0.00136 | 0.29899                             | 0.00398 | 4.41494                             | 0.06569 | 0.8946475 | 96                     | 1750.6                               | 23.01 | 1686.3                              | 19.74 | 1715.1                              | 12.32 |
| Z14_2                                                                            | 0.10682                              | 0.00154 | 0.29290                             | 0.00369 | 4.31366                             | 0.06675 | 0.8141448 | 95                     | 1745.8                               | 26.07 | 1656.0                              | 18.41 | 1696.0                              | 12.76 |
| Z16_1                                                                            | 0.10941                              | 0.00121 | 0.30404                             | 0.00390 | 4.58549                             | 0.06133 | 0.9590620 | 96                     | 1789.5                               | 19.97 | 1711.3                              | 19.27 | 1746.6                              | 11.15 |
| Z17_1                                                                            | 0.11075                              | 0.00131 | 0.30434                             | 0.00403 | 4.64617                             | 0.06643 | 0.9261405 | 95                     | 1811.8                               | 21.26 | 1712.8                              | 19.94 | 1757.6                              | 11.95 |
| Z18_1                                                                            | 0.10981                              | 0.00121 | 0.31421                             | 0.00397 | 4.75643                             | 0.06274 | 0.9578712 | 98                     | 1796.2                               | 19.91 | 1761.4                              | 19.47 | 1777.2                              | 11.07 |
| Z21_1                                                                            | 0.11017                              | 0.00127 | 0.32591                             | 0.00405 | 4.95003                             | 0.06630 | 0.9277942 | 101                    | 1802.2                               | 20.84 | 1818.5                              | 19.71 | 1810.8                              | 11.31 |
| Z22_1                                                                            | 0.11004                              | 0.00134 | 0.31778                             | 0.00398 | 4.82115                             | 0.06703 | 0.9008198 | 99                     | 1800.1                               | 22.02 | 1778.9                              | 19.49 | 1788.6                              | 11.69 |
| Z24_1                                                                            | 0.10732                              | 0.00141 | 0.29359                             | 0.00404 | 4.34347                             | 0.06820 | 0.8763802 | 95                     | 1754.5                               | 23.86 | 1659.5                              | 20.12 | 1701.7                              | 12.96 |
| Z25_2                                                                            | 0.10790                              | 0.00121 | 0.30385                             | 0.00406 | 4.52090                             | 0.06339 | 0.9529518 | 97                     | 1764.2                               | 20.23 | 1710.4                              | 20.09 | 1734.8                              | 11.66 |
| Z29_1                                                                            | 0.10801                              | 0.00127 | 0.30997                             | 0.00421 | 4.61713                             | 0.06712 | 0.9342919 | 99                     | 1766.1                               | 21.37 | 1740.6                              | 20.72 | 1752.4                              | 12.13 |
| Z30_1                                                                            | 0.11063                              | 0.00137 | 0.30981                             | 0.00439 | 4.72614                             | 0.07330 | 0.9136328 | 96                     | 1809.9                               | 22.26 | 1739.8                              | 21.59 | 1771.9                              | 13.00 |
| Z31_2                                                                            | 0.11036                              | 0.00141 | 0.30549                             | 0.00437 | 4.64839                             | 0.07413 | 0.8970011 | 95                     | 1805.3                               | 23.10 | 1718.5                              | 21.57 | 1758.0                              | 13.33 |
| 1                                                                                | 0.11060                              | 0.00148 | 0.31730                             | 0.00415 | 4.83712                             | 0.07347 | 0.8611025 | 98                     | 1809.3                               | 24.13 | 1776.5                              | 20.31 | 1791.4                              | 12.78 |
| 2                                                                                | 0.11007                              | 0.00144 | 0.32299                             | 0.00410 | 4.89952                             | 0.07151 | 0.8697242 | 100                    | 1800.5                               | 23.63 | 1804.3                              | 19.99 | 1802.2                              | 12.31 |
| 4                                                                                | 0.10952                              | 0.00132 | 0.33118                             | 0.00402 | 4.99978                             | 0.06713 | 0.9040578 | 103                    | 1791.5                               | 21.77 | 1844.1                              | 19.46 | 1819.3                              | 11.36 |
| 6                                                                                | 0.11151                              | 0.00147 | 0.31982                             | 0.00412 | 4.91807                             | 0.07304 | 0.8674122 | 98                     | 1824.2                               | 23.72 | 1788.9                              | 20.12 | 1805.4                              | 12.53 |
| 7                                                                                | 0.10496                              | 0.00132 | 0.31399                             | 0.00378 | 4.54347                             | 0.06236 | 0.8771170 | 103                    | 1713.7                               | 22.95 | 1760.3                              | 18.53 | 1739.0                              | 11.42 |
| 10                                                                               | 0.11114                              | 0.00136 | 0.31408                             | 0.00391 | 4.81218                             | 0.06681 | 0.8966787 | 97                     | 1818.1                               | 22.07 | 1760.8                              | 19.19 | 1787.0                              | 11.67 |
| 11                                                                               | 0.10586                              | 0.00133 | 0.30257                             | 0.00369 | 4.41593                             | 0.06128 | 0.8788281 | 99                     | 1729.3                               | 22.90 | 1704.0                              | 18.26 | 1715.3                              | 11.49 |
| 12                                                                               | 0.10945                              | 0.00158 | 0.30185                             | 0.00387 | 4.55567                             | 0.07136 | 0.8184972 | 95                     | 1790.3                               | 26.07 | 1700.5                              | 19.15 | 1741.2                              | 13.04 |
| 13                                                                               | 0.11055                              | 0.00182 | 0.32435                             | 0.00428 | 4.94197                             | 0.08601 | 0.7581952 | 100                    | 1808.5                               | 29.65 | 1810.9                              | 20.81 | 1809.5                              | 14.70 |
| 15                                                                               | 0.11041                              | 0.00178 | 0.33683                             | 0.00437 | 5.12673                             | 0.08720 | 0.7627718 | 104                    | 1806.1                               | 29.01 | 1871.4                              | 21.08 | 1840.5                              | 14.45 |
| 16                                                                               | 0.11038                              | 0.00179 | 0.31495                             | 0.00408 | 4.79311                             | 0.08170 | 0.7600005 | 98                     | 1805.7                               | 29.22 | 1765.0                              | 20.02 | 1783.7                              | 14.32 |
| 17                                                                               | 0.11194                              | 0.00178 | 0.31819                             | 0.00410 | 4.90991                             | 0.08230 | 0.7687250 | 97                     | 1831.1                               | 28.56 | 1780.9                              | 20.07 | 1804.0                              | 14.14 |
| 18                                                                               | 0.10930                              | 0.00143 | 0.33752                             | 0.00409 | 5.08630                             | 0.07233 | 0.8521328 | 105                    | 1787.8                               | 23.76 | 1874.7                              | 19.71 | 1833.8                              | 12.07 |
| 19                                                                               | 0.10850                              | 0.00171 | 0.31561                             | 0.00403 | 4.72059                             | 0.07802 | 0.7725821 | 100                    | 1774.3                               | 28.47 | 1768.2                              | 19.75 | 1770.9                              | 13.85 |
| 22                                                                               | 0.10844                              | 0.00135 | 0.30789                             | 0.00364 | 4.60220                             | 0.06206 | 0.8767172 | 98                     | 1773.3                               | 22.62 | 1730.3                              | 17.92 | 1749.7                              | 11.25 |
| 24                                                                               | 0.10667                              | 0.00137 | 0.31936                             | 0.00368 | 4.69543                             | 0.06336 | 0.8539403 | 102                    | 1743.3                               | 23.21 | 1786.6                              | 18.00 | 1766.4                              | 11.30 |
| 26                                                                               | 0.11065                              | 0.00130 | 0.31803                             | 0.00373 | 4.85049                             | 0.06236 | 0.9122634 | 98                     | 1810.1                               | 21.14 | 1780.1                              | 18.25 | 1793.7                              | 10.82 |
| 27                                                                               | 0.10852                              | 0.00140 | 0.30808                             | 0.00381 | 4.60767                             | 0.06567 | 0.8677124 | 98                     | 1774.7                               | 23.47 | 1731.2                              | 18.76 | 1750.7                              | 11.89 |
| 30                                                                               | 0.10927                              | 0.00129 | 0.31301                             | 0.00370 | 4.71438                             | 0.06152 | 0.9058406 | 98                     | 1787.2                               | 21.47 | 1755.5                              | 18.19 | 1769.8                              | 10.93 |
| 31                                                                               | 0.10829                              | 0.00153 | 0.31325                             | 0.00387 | 4.67322                             | 0.07068 | 0.8168448 |                        |                                      |       |                                     |       |                                     |       |



**Appendix 1** Full compilation of LA-ICP-MS zircon and monazite U–Pb age data

Black = magmatic or detrital analyses, Green = metamorphic analyses, Red = excluded analyses

| Isotopic ratios <sup>1</sup>                                                             |                                      |         |                                     |         |                                     |         |           |                        |                                      |         |                                     |        |                                     | Age estimates <sup>1</sup> |  |  |  |  |  |
|------------------------------------------------------------------------------------------|--------------------------------------|---------|-------------------------------------|---------|-------------------------------------|---------|-----------|------------------------|--------------------------------------|---------|-------------------------------------|--------|-------------------------------------|----------------------------|--|--|--|--|--|
| Spot name                                                                                | <sup>207</sup> Pb/ <sup>206</sup> Pb | ±1σ     | <sup>206</sup> Pb/ <sup>238</sup> U | ±1σ     | <sup>207</sup> Pb/ <sup>235</sup> U | ±1σ     | rho       | Conc. (%) <sup>2</sup> | <sup>207</sup> Pb/ <sup>206</sup> Pb | ±1σ     | <sup>206</sup> Pb/ <sup>238</sup> U | ±1σ    | <sup>207</sup> Pb/ <sup>235</sup> U | ±1σ                        |  |  |  |  |  |
| Z11_1                                                                                    | 0.10831                              | 0.00129 | 0.26312                             | 0.00352 | 3.92909                             | 0.05686 | 0.9244298 | 85                     | 1771.1                               | 21.61   | 1505.8                              | 17.97  | 1619.7                              | 11.71                      |  |  |  |  |  |
| Z11_2                                                                                    | 0.10736                              | 0.00127 | 0.28289                             | 0.00372 | 4.18702                             | 0.05957 | 0.9242783 | 92                     | 1755.0                               | 21.51   | 1605.9                              | 18.72  | 1671.5                              | 11.66                      |  |  |  |  |  |
| Z13_1                                                                                    | 0.10897                              | 0.00122 | 0.29355                             | 0.00378 | 4.41056                             | 0.05980 | 0.9497346 | 93                     | 1782.2                               | 20.31   | 1659.3                              | 18.86  | 1714.3                              | 11.22                      |  |  |  |  |  |
| Z15_1                                                                                    | 0.10712                              | 0.00125 | 0.28482                             | 0.00369 | 4.20534                             | 0.05866 | 0.9287845 | 92                     | 1751.0                               | 21.06   | 1615.6                              | 18.54  | 1675.1                              | 11.44                      |  |  |  |  |  |
| Z19_1                                                                                    | 0.10672                              | 0.00122 | 0.27492                             | 0.00342 | 4.04512                             | 0.05389 | 0.9337766 | 90                     | 1744.1                               | 20.88   | 1565.7                              | 17.28  | 1643.3                              | 10.85                      |  |  |  |  |  |
| Z20_1                                                                                    | 0.10654                              | 0.00124 | 0.26858                             | 0.00349 | 3.94459                             | 0.05508 | 0.9305928 | 88                     | 1741.1                               | 21.19   | 1533.6                              | 17.72  | 1622.9                              | 11.31                      |  |  |  |  |  |
| Z20_2                                                                                    | 0.10996                              | 0.00125 | 0.29758                             | 0.00382 | 4.51074                             | 0.06174 | 0.9378660 | 93                     | 1798.7                               | 20.63   | 1679.3                              | 19.00  | 1733.0                              | 11.38                      |  |  |  |  |  |
| Z23_1                                                                                    | 0.11011                              | 0.00142 | 0.27822                             | 0.00345 | 4.22361                             | 0.06023 | 0.8695643 | 88                     | 1801.2                               | 23.25   | 1582.4                              | 17.38  | 1678.6                              | 11.71                      |  |  |  |  |  |
| Z24_2                                                                                    | 0.11192                              | 0.00165 | 0.23433                             | 0.00298 | 3.61591                             | 0.05745 | 0.8004163 | 74                     | 1830.7                               | 26.52   | 1357.2                              | 15.58  | 1553.0                              | 12.64                      |  |  |  |  |  |
| Z25_1                                                                                    | 0.10963                              | 0.00137 | 0.21626                             | 0.00306 | 3.26925                             | 0.05079 | 0.9107835 | 70                     | 1793.2                               | 22.62   | 1262.1                              | 16.23  | 1473.8                              | 12.08                      |  |  |  |  |  |
| Z26_1                                                                                    | 0.10836                              | 0.00121 | 0.26369                             | 0.00349 | 3.94037                             | 0.05478 | 0.9520215 | 85                     | 1771.9                               | 20.33   | 1508.7                              | 17.82  | 1622.0                              | 11.26                      |  |  |  |  |  |
| Z27_1                                                                                    | 0.10831                              | 0.00121 | 0.27292                             | 0.00362 | 4.07698                             | 0.05675 | 0.9528969 | 88                     | 1771.2                               | 20.32   | 1555.6                              | 18.34  | 1649.7                              | 11.35                      |  |  |  |  |  |
| Z27_2                                                                                    | 0.10931                              | 0.00122 | 0.29351                             | 0.00394 | 4.42487                             | 0.06214 | 0.9558783 | 93                     | 1788.0                               | 20.16   | 1659.1                              | 19.66  | 1717.0                              | 11.63                      |  |  |  |  |  |
| Z28_1                                                                                    | 0.10713                              | 0.00126 | 0.27802                             | 0.00369 | 4.10782                             | 0.05881 | 0.9270658 | 90                     | 1751.1                               | 21.37   | 1581.4                              | 18.59  | 1655.9                              | 11.69                      |  |  |  |  |  |
| Z31_1                                                                                    | 0.10800                              | 0.00127 | 0.28436                             | 0.00392 | 4.23478                             | 0.06258 | 0.9328522 | 91                     | 1765.8                               | 21.33   | 1613.3                              | 19.69  | 1680.8                              | 12.14                      |  |  |  |  |  |
| 3                                                                                        | 0.11236                              | 0.00145 | 0.23512                             | 0.00304 | 3.64251                             | 0.05365 | 0.8778393 | 74                     | 1838.0                               | 23.18   | 1361.3                              | 15.88  | 1558.9                              | 11.73                      |  |  |  |  |  |
| 5                                                                                        | 0.10624                              | 0.00150 | 0.28262                             | 0.00371 | 4.13829                             | 0.06501 | 0.8356257 | 92                     | 1735.8                               | 25.69   | 1604.6                              | 18.65  | 1661.9                              | 12.85                      |  |  |  |  |  |
| 8                                                                                        | 0.10279                              | 0.00154 | 0.27536                             | 0.00325 | 3.90140                             | 0.05952 | 0.7736420 | 94                     | 1675.0                               | 27.40   | 1568.0                              | 16.45  | 1614.0                              | 12.33                      |  |  |  |  |  |
| 9                                                                                        | 0.10184                              | 0.00137 | 0.26158                             | 0.00314 | 3.67239                             | 0.05299 | 0.8319170 | 90                     | 1658.0                               | 24.80   | 1497.9                              | 16.06  | 1565.4                              | 11.52                      |  |  |  |  |  |
| 14                                                                                       | 0.11277                              | 0.00158 | 0.29697                             | 0.00375 | 4.61714                             | 0.07027 | 0.8297013 | 91                     | 1844.5                               | 25.20   | 1676.3                              | 18.64  | 1752.4                              | 12.70                      |  |  |  |  |  |
| 21                                                                                       | 0.11939                              | 0.00172 | 0.32195                             | 0.00418 | 5.29882                             | 0.08358 | 0.8231228 | 92                     | 1947.1                               | 25.57   | 1799.2                              | 20.40  | 1868.7                              | 13.47                      |  |  |  |  |  |
| 23                                                                                       | 0.10964                              | 0.00143 | 0.25139                             | 0.00295 | 3.79896                             | 0.05256 | 0.8481709 | 81                     | 1793.5                               | 23.56   | 1445.6                              | 15.20  | 1592.5                              | 11.12                      |  |  |  |  |  |
| 25                                                                                       | 0.10875                              | 0.00131 | 0.27159                             | 0.00332 | 4.07109                             | 0.05526 | 0.9005838 | 87                     | 1778.6                               | 21.88   | 1548.9                              | 16.84  | 1648.5                              | 11.07                      |  |  |  |  |  |
| 29                                                                                       | 0.10592                              | 0.00158 | 0.27233                             | 0.00320 | 3.97687                             | 0.06015 | 0.7768913 | 90                     | 1730.3                               | 27.05   | 1552.6                              | 16.20  | 1629.5                              | 12.27                      |  |  |  |  |  |
| MF2 - zircon: analyses excluded from calculations due to being interpreted as inherited. |                                      |         |                                     |         |                                     |         |           |                        |                                      |         |                                     |        |                                     |                            |  |  |  |  |  |
| 20                                                                                       | 0.11338                              | 0.00160 | 0.33885                             | 0.00414 | 5.29619                             | 0.07930 | 0.8159870 | 101                    | 1854.3                               | 25.28   | 1881.2                              | 19.93  | 1868.2                              | 12.79                      |  |  |  |  |  |
| 28                                                                                       | 0.12039                              | 0.00187 | 0.36229                             | 0.00477 | 6.01256                             | 0.10041 | 0.7883961 | 102                    | 1962.0                               | 27.51   | 1993.0                              | 22.59  | 1977.7                              | 14.54                      |  |  |  |  |  |
| Z13_2                                                                                    | 0.11338                              | 0.00146 | 0.34009                             | 0.00467 | 5.31617                             | 0.08212 | 0.8889410 | 102                    | 1854.3                               | 23.17   | 1887.1                              | 22.47  | 1871.5                              | 13.20                      |  |  |  |  |  |
| DT1 - monazite: analyses used in weighted average age calculation.                       |                                      |         |                                     |         |                                     |         |           |                        |                                      |         |                                     |        |                                     |                            |  |  |  |  |  |
| BO10_01A                                                                                 | 0.09736                              | 0.00112 | 0.27412                             | 0.00408 | 3.67796                             | 0.05750 | 0.9520475 | 100                    | 1574.1                               | 21.38   | 1561.7                              | 20.62  | 1566.6                              | 12.48                      |  |  |  |  |  |
| BO10_01B                                                                                 | 0.09747                              | 0.00113 | 0.27433                             | 0.00409 | 3.68474                             | 0.05803 | 0.9466824 | 100                    | 1576.2                               | 21.59   | 1562.7                              | 20.70  | 1568.1                              | 12.58                      |  |  |  |  |  |
| BO10_01C                                                                                 | 0.09693                              | 0.00118 | 0.28070                             | 0.00415 | 3.74989                             | 0.05997 | 0.9244643 | 99                     | 1565.9                               | 22.73   | 1594.9                              | 20.87  | 1582.1                              | 12.82                      |  |  |  |  |  |
| BO10_02A                                                                                 | 0.09871                              | 0.00116 | 0.29074                             | 0.00430 | 3.95506                             | 0.06231 | 0.9387696 | 99                     | 1599.9                               | 21.80   | 1645.2                              | 21.46  | 1625.0                              | 12.77                      |  |  |  |  |  |
| BO10_02B                                                                                 | 0.09742                              | 0.00114 | 0.28402                             | 0.00421 | 3.81325                             | 0.06027 | 0.9378368 | 99                     | 1575.4                               | 21.81   | 1611.6                              | 21.16  | 1595.5                              | 12.71                      |  |  |  |  |  |
| BO10_02C                                                                                 | 0.09727                              | 0.00123 | 0.28574                             | 0.00424 | 3.83017                             | 0.06255 | 0.9086268 | 99                     | 1572.4                               | 23.58   | 1620.2                              | 21.25  | 1599.1                              | 13.15                      |  |  |  |  |  |
| BO10_03A                                                                                 | 0.09767                              | 0.00117 | 0.27741                             | 0.00414 | 3.73404                             | 0.05978 | 0.9321832 | 100                    | 1580.2                               | 22.32   | 1578.3                              | 20.89  | 1578.7                              | 12.82                      |  |  |  |  |  |
| BO10_03B                                                                                 | 0.09719                              | 0.00122 | 0.28246                             | 0.00423 | 3.78285                             | 0.06214 | 0.9116566 | 99                     | 1570.8                               | 23.42   | 1603.8                              | 21.28  | 1589.1                              | 13.19                      |  |  |  |  |  |
| BO10_03C                                                                                 | 0.09783                              | 0.00129 | 0.27994                             | 0.00429 | 3.77435                             | 0.06458 | 0.8956462 | 100                    | 1583.2                               | 24.51   | 1591.0                              | 21.59  | 1587.3                              | 13.74                      |  |  |  |  |  |
| BO10_04A                                                                                 | 0.09779                              | 0.00125 | 0.28386                             | 0.00427 | 3.82541                             | 0.06347 | 0.9066364 | 99                     | 1582.4                               | 23.81   | 1610.8                              | 21.45  | 1598.1                              | 13.36                      |  |  |  |  |  |
| BO10_04B                                                                                 | 0.09948                              | 0.00139 | 0.27710                             | 0.00412 | 3.79876                             | 0.06507 | 0.8680040 | 101                    | 1614.3                               | 25.83   | 1576.8                              | 20.81  | 1592.5                              | 13.77                      |  |  |  |  |  |
| BO10_5A                                                                                  | 0.09902                              | 0.00143 | 0.27213                             | 0.00415 | 3.71355                             | 0.06654 | 0.8510952 | 101                    | 1605.7                               | 26.67   | 1551.6                              | 21.04  | 1574.3                              | 14.33                      |  |  |  |  |  |
| BO10_5B                                                                                  | 0.09765                              | 0.00147 | 0.27597                             | 0.00422 | 3.71366                             | 0.06812 | 0.8336391 | 100                    | 1579.7                               | 27.88   | 1571.0                              | 21.33  | 1574.3                              | 14.67                      |  |  |  |  |  |
| BO10_6A                                                                                  | 0.09789                              | 0.00155 | 0.28236                             | 0.00435 | 3.80902                             | 0.07212 | 0.8136612 | 99                     | 1584.2                               | 29.24   | 1603.2                              | 21.87  | 1594.7                              | 15.23                      |  |  |  |  |  |
| BO10_6B                                                                                  | 0.09771                              | 0.00150 | 0.27820                             | 0.00436 | 3.74589                             | 0.07049 | 0.8328310 | 100                    | 1581.0                               | 28.47   | 1582.3                              | 21.97  | 1581.2                              | 15.08                      |  |  |  |  |  |
| BO10_7A                                                                                  | 0.09614                              | 0.00147 | 0.28285                             | 0.00439 | 3.74729                             | 0.07004 | 0.8303850 | 98                     | 1550.5                               | 28.47   | 1605.7                              | 22.08  | 1581.5                              | 14.98                      |  |  |  |  |  |
| BO10_7B                                                                                  | 0.09865                              | 0.00154 | 0.27704                             | 0.00428 | 3.76646                             | 0.07092 | 0.8204761 | 101                    | 1598.8                               | 28.85   | 1576.5                              | 21.59  | 1585.6                              | 15.11                      |  |  |  |  |  |
| BO10_8A                                                                                  | 0.09802                              | 0.00167 | 0.29224                             | 0.00459 | 3.94764                             | 0.07874 | 0.7874358 | 98                     | 1586.8                               | 31.45   | 1652.7                              | 22.87  | 1623.5                              | 16.16                      |  |  |  |  |  |
| BO10_8B                                                                                  | 0.09816                              | 0.00180 | 0.28641                             | 0.00445 | 3.87459                             | 0.08061 | 0.7468075 | 99                     | 1589.4                               | 33.86   | 1623.5                              | 22.29  | 1608.4                              | 16.79                      |  |  |  |  |  |
| BO10_9A                                                                                  | 0.09777                              | 0.00162 | 0.27977                             | 0.00442 | 3.76903                             | 0.07442 | 0.8001309 | 100                    | 1582.1                               | 30.63   | 1590.2                              | 22.26  | 1586.2                              | 15.84                      |  |  |  |  |  |
| BO10_9B                                                                                  | 0.09765                              | 0.00167 | 0.27320                             | 0.00425 | 3.67655                             | 0.07342 | 0.7789944 | 101                    | 1579.8                               | 31.75   | 1557.0                              | 21.51  | 1566.3                              | 15.94                      |  |  |  |  |  |
| BO10_9C                                                                                  | 0.09688                              | 0.00172 | 0.27726                             | 0.00433 | 3.70192                             | 0.07568 | 0.7639177 | 100                    | 1565.0                               | 32.93   | 1577.6                              | 21.86  | 1571.8                              | 16.34                      |  |  |  |  |  |
| BO10_10A                                                                                 | 0.09906                              | 0.00174 | 0.27412                             | 0.00429 | 3.74263                             | 0.07615 | 0.7691722 | 101                    | 1606.6                               | 32.36   | 1561.7                              | 21.71  | 1580.5                              | 16.30                      |  |  |  |  |  |
| BO10_10B                                                                                 | 0.09734                              | 0.00165 | 0.27273                             | 0.00427 | 3.65834                             | 0.07294 | 0.7852596 | 100                    | 1573.7                               | 31.38   | 1554.7                              | 21.64  | 1562.3                              | 15.90                      |  |  |  |  |  |
| DT1 - monazite: analysis excluded from calculations due to analytical error.             |                                      |         |                                     |         |                                     |         |           |                        |                                      |         |                                     |        |                                     |                            |  |  |  |  |  |
| BO10_04C                                                                                 | 0.10362                              | 0.55142 | -0.07035                            | 0.13622 | 16.84387                            | error   | error     | -622                   | 1690.0                               | 2945.11 | -470.3                              | 944.61 | 2926.0                              | error                      |  |  |  |  |  |
| OG3 - monazite: analyses used in weighted average age calculation.                       |                                      |         |                                     |         |                                     |         |           |                        |                                      |         |                                     |        |                                     |                            |  |  |  |  |  |
| M101                                                                                     | 0.09649                              | 0.00100 | 0.26937                             | 0.00394 | 3.58148                             | 0.05244 | 0.9989571 | 99                     | 1557.3                               | 19.34   | 1537.6                              | 20.00  | 1545.4                              | 11.62                      |  |  |  |  |  |
| M102                                                                                     | 0.09633                              | 0.00101 | 0.27330                             | 0.00401 | 3.62762                             | 0.05341 | 0.9965611 | 100                    | 1554.2                               | 19.48   | 1557.5                              | 20.29  | 1555.6                              | 11.72                      |  |  |  |  |  |
| M203                                                                                     | 0.09873                              | 0.00103 | 0.28953                             | 0.00424 | 3.93894                             | 0.05793 | 0.9957450 | 102                    | 1600.2                               | 19.42   | 1639.2                              | 21.18  | 1621.7                              | 11.91                      |  |  |  |  |  |
| M204                                                                                     | 0.09530                              | 0.00103 | 0.27309                             | 0.00403 | 3.58668                             | 0.05372 | 0.9852714 | 101                    | 1534.0                               | 20.12   | 1556.5                              | 20.39  | 1546.6                              | 11.89                      |  |  |  |  |  |
| M305                                                                                     | 0.09482                              | 0.00100 | 0.27402                             | 0.00401 | 3.58041                             | 0.05289 | 0.9906524 | 102                    | 1524.5                               | 19.79   | 1561.2                              | 20.30  | 1545.2                              | 11.72                      |  |  |  |  |  |
| M406                                                                                     | 0.09719                              | 0.00103 | 0.27592                             | 0.00404 | 3.69538                             | 0.05464 | 0.9902540 | 100                    | 1570.9                               | 19.74   | 1570.8                              | 20.40  | 1570.4                              | 11.82                      |  |  |  |  |  |
| M507                                                                                     | 0.09614                              | 0.00102 | 0.27923                             | 0.00409 | 3.69924                             | 0.05478 | 0.9891262 | 102                    | 1550.4                               | 19.86   | 1587.5                              | 20.59  | 1571.2                              | 11.84                      |  |  |  |  |  |
| M508                                                                                     | 0.09638                              | 0.00103 | 0.26902                             | 0.00393 | 3.57295                             | 0.05289 | 0.9868732 | 99                     | 1555.2                               | 19.91   | 1535                                |        |                                     |                            |  |  |  |  |  |
